# Supplementary material for: Stereospecific synthesis of a twinned alanine ester
Source: Royal Society of Chemistry journal article supplement (doi:10.1039/c3ob41582a), 2013-01-01
Supplement: c3ob41582a.pdf [file c3ob41582a.pdf]

# Supporting Information

## Stereospecific Synthesis of a Twinned Alanine Ester

Jik Chin<sup>\*a,b</sup> Soon Ho Kwon,<sup>a,c</sup> Kimia Moozeh,<sup>a</sup> Soon Mog So,<sup>a,b</sup> Alan J. Lough,<sup>a</sup> B. Moon Kim,<sup>\*c</sup>

<sup>a</sup> Department of Chemistry, University of Toronto, Toronto, Ontario M5S 3H6, Canada

<sup>b</sup> DiaminoPharm Inc., Toronto M2N 7B2, Canada

<sup>c</sup> Department of Chemistry, College of Natural Sciences, Seoul National University, Seoul 151-747, South Korea

### Table of Contents

|                                 |             |
|---------------------------------|-------------|
| <b>General Information</b>      | <b>S-2</b>  |
| <b>Preparation of compounds</b> | <b>S-2</b>  |
| <b>NMR Spectra</b>              | <b>S-4</b>  |
| <b>HPLC data</b>                | <b>S-6</b>  |
| <b>Calculation Results</b>      | <b>S-8</b>  |
| <b>Crystal Structure data</b>   | <b>S-47</b> |

## General Information

Commercially available compounds were used without further purification or drying. The  $^1\text{H}$  NMR and  $^{13}\text{C}$  NMR spectra were recorded on a Varian Mercury 400 spectrometer or a Bruker Advance III spectrometer operating at 400 MHz. High resolution mass spectra (HRMS) were obtained on an ABI/Sciex QStar Mass Spectrometer (ESI) at Advanced Instrumentation for Molecular Structure (AIMS) at the University of Toronto and on a ThermoFinnigan LCQ™ Classic, Quadrupole Ion-Trap Mass Spectrometer at Seoul National University. HPLC analysis was performed on a Hewlett-Packard 1100 Series HPLC, UV detection monitored at 254.4 nm using a Chiralpak® IA column (25cm). Optical rotation was obtained at 589 nm using a Rudolph Autopol IV polarimeter at the University of Toronto and on a JASCO P-1030 automatic polarimeter at Seoul National University. Melting points were recorded using an Electrothermal IA 9100 digital melting point apparatus. Reactions were monitored using  $^1\text{H}$  NMR spectroscopy. Chromatography was performed on Silicycle 230-400 mesh silica gel and thin-layer chromatography (TLC) was performed on EMD Silica Gel 60 F<sub>254</sub> plates. Visualization of the developed plates was performed under UV light (254 nm). All calculations were performed using Spartan '08 for Windows from Wavefunction Inc.

## Preparation of 5-membered imidazolidine intermediate (1)

After adding methyl pyruvate (407  $\mu\text{L}$ , 4.51 mmol) to (*R,R*)-1,2-bis(2-hydroxyphenyl)-1,2-diaminoethane (1.0 g, 4.1 mmol) in  $\text{CHCl}_3$ , the reaction mixture was stirred at 50 °C for 1 h until starting material was all removed. The solvent was removed *in vacuo* and 2 mL of diethyl ether was added to afford a desired product and 5 mL of *n*-hexane was added to reduce the loss of isolated yield. The solid was filtered, washed with 10 mL of *n*-hexane, and dried in vacuum. The desired product was obtained as light yellow solid (1.25 g, 93% yield).

(*R,R*)- 1

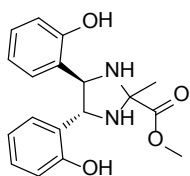

Light yellow solid (93% yield), mp 137-138 °C

$^1\text{H}$  NMR (400 MHz,  $\text{CDCl}_3$ ):  $\delta$  10.74 (s, 2H), 7.23 – 7.08 (m, 2H), 6.92 – 6.80 (m, 2H), 6.61 (td,  $J = 7.4, 1.1$  Hz, 1H), 6.56 (td,  $J = 7.5, 1.1$  Hz, 1H), 6.33 (dd,  $J = 7.6, 1.6$  Hz, 1H), 6.20 (dd,  $J = 7.6, 1.5$  Hz, 1H), 4.64 (d,  $J = 9.7$  Hz, 1H), 4.36 (d,  $J = 9.8$  Hz, 1H), 3.91 (s, 3H), 1.79 (s, 3H).

$^{13}\text{C}$  NMR (101 MHz,  $\text{CDCl}_3$ ):  $\delta$  174.4, 157.5, 157.3, 130.0, 129.7, 129.5, 129.3, 119.5, 119.4, 119.1, 118.9, 117.2, 117.0, 76.4, 67.4, 66.1, 53.6, 27.3.

$[\alpha]_{\text{D}}^{24} +6.51$  ( $c = 1.0, \text{CHCl}_3$ )

HRMS (ESI) calculated for  $\text{C}_{18}\text{H}_{21}\text{N}_2\text{O}_4$   $[\text{M}+\text{H}]^+$  : 329.1501, Found: 329.1494

### Preparation of chiral diimine containing vicinal quaternary carbon centers (**3**)

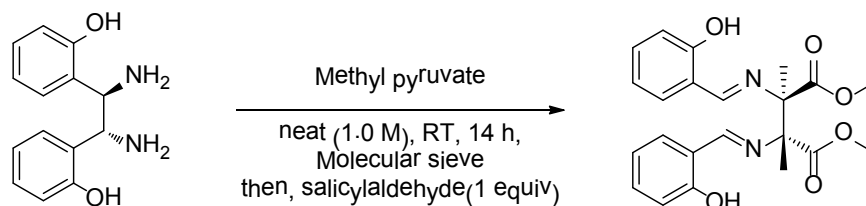

After adding methyl pyruvate (2.05 mL, 1.0 M) with activated molecular sieve (3 Å) to (*R,R*)-1,2-bis(2-hydroxyphenyl)-1,2-diaminoethane (0.5 g, 2.05 mmol) in CHCl<sub>3</sub>, the mixture was stirred at room temperature for 14 h until 5-membered ring was all removed. Salicylaldehyde (218 μL, 2.05 mmol) was added to the reaction mixture and the mixture was stirred at room temperature for 1 h. The reaction mixture was purified using short column chromatography eluting with hexane / ethyl acetate (20 %) to remove excess methyl pyruvate and salicylaldehyde. Recrystallization of obtained crude product in diethyl ether / *n*-hexane gave the desired product as a yellow monoclinic crystal (60% yield).

#### (*R,R*)-**3**

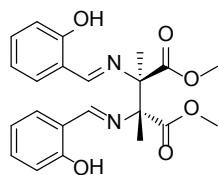

Yellow monoclinic crystal (60% yield), mp 115-116 °C

<sup>1</sup>H NMR (400 MHz, CDCl<sub>3</sub>): δ ppm 12.98 (s, 1H); 8.39 (s, 1H); 7.34 (t, *J* = 7.8 Hz, 1H); 7.28 (d, *J* = 7.6 Hz, 1H); 6.98 (d, *J* = 8.4 Hz, 1H); 6.89 (t, *J* = 7.5 Hz, 1H); 3.76 (s, 3H); 1.70 (s, 3H).

<sup>13</sup>C NMR (100 MHz, CDCl<sub>3</sub>): δ ppm 172.0, 165.2, 161.1, 133.2, 132.4, 119.0, 118.9, 117.5, 73.6, 53.0, 19.3.

The enantiopurity was confirmed by HPLC analysis (Chiralpak<sup>®</sup> IA column, *n*-Hexane : *i*-PrOH = 90:10, 1.0 ml/min); *Rac*-**3** *t*<sub>R</sub> = 8.96 min, *t*<sub>R</sub> = 16.34 min, (*R,R*)-**3** *t*<sub>R</sub> = 16.32 min, (*S,S*)-**3** *t*<sub>R</sub> = 8.98 min

[α]<sub>D</sub><sup>27</sup> +175.95 (c = 1.0, CHCl<sub>3</sub>)

HRMS (ESI) calculated for C<sub>22</sub>H<sub>25</sub>N<sub>2</sub>O<sub>6</sub> [M+H]<sup>+</sup>: 413.1713, Found: 413.1707.

## NMR spectra

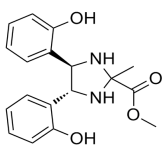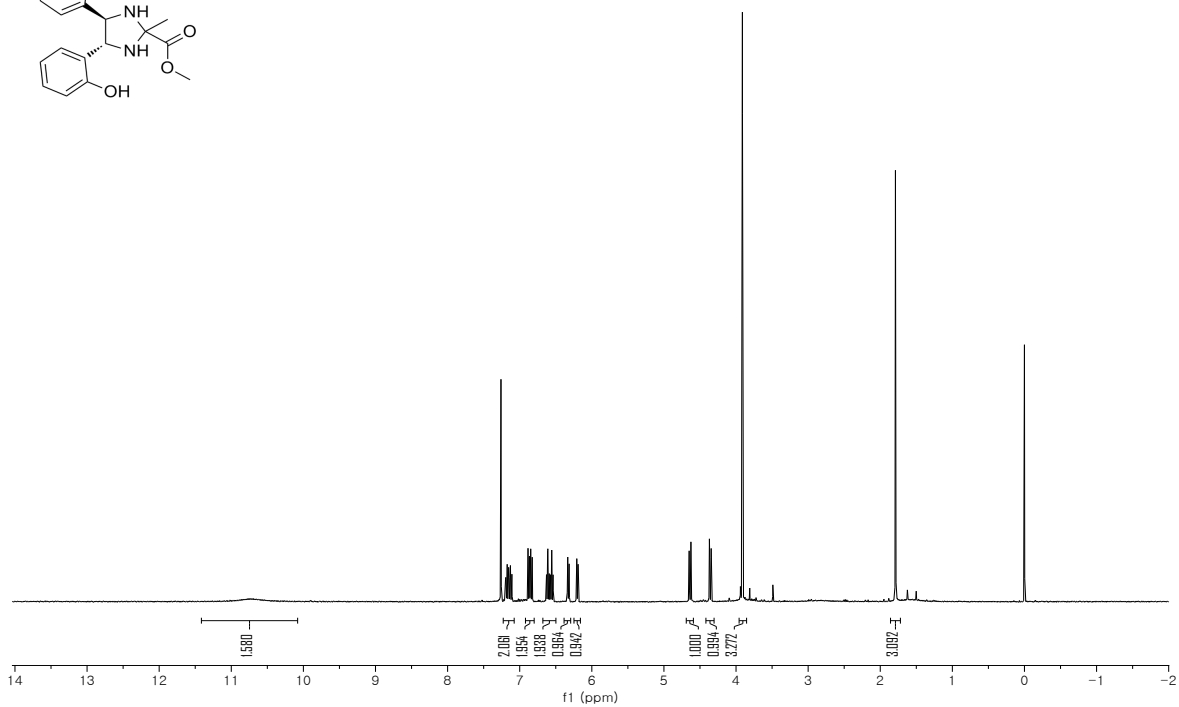

Compound 1 (400 MHz, CDCl<sub>3</sub>)

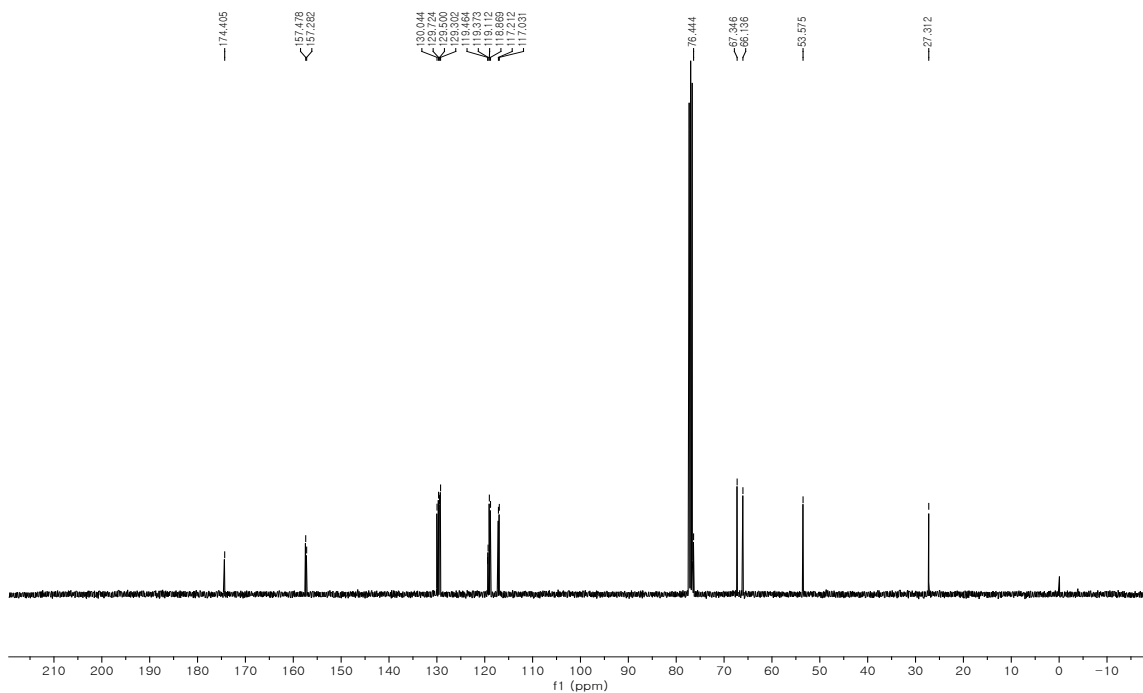

Compound 1 (100 MHz, CDCl<sub>3</sub>)

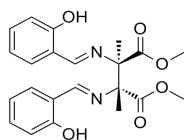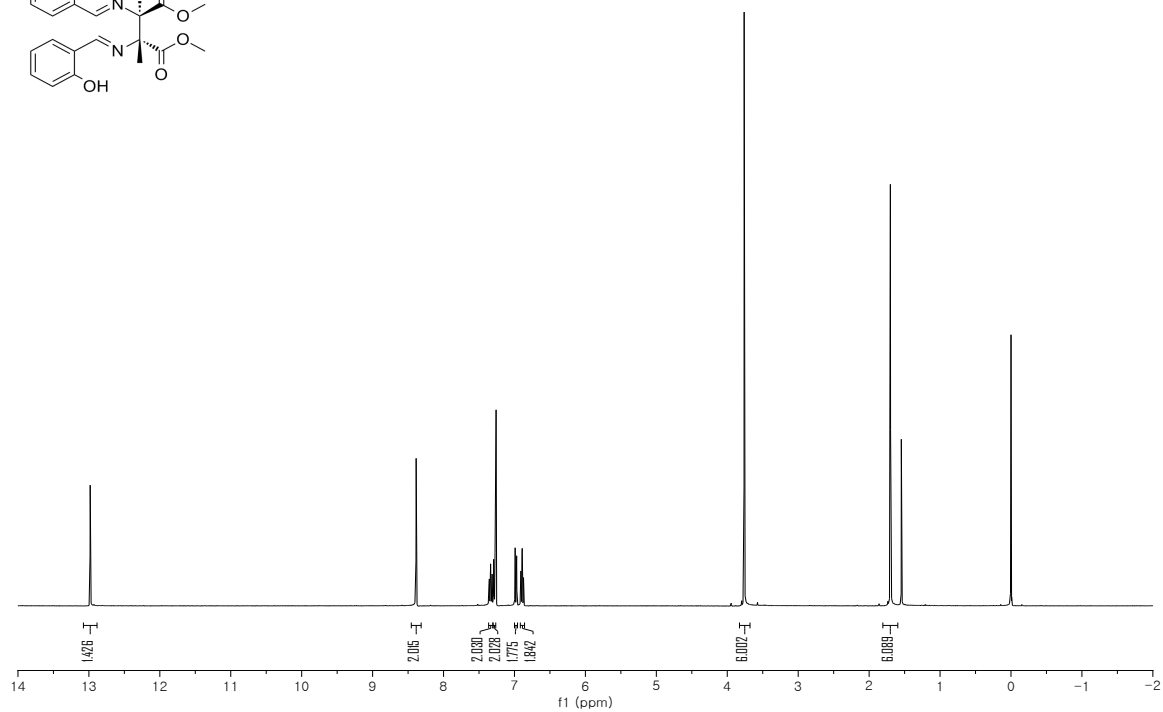

Compound 3 (400 MHz, CDCl<sub>3</sub>)

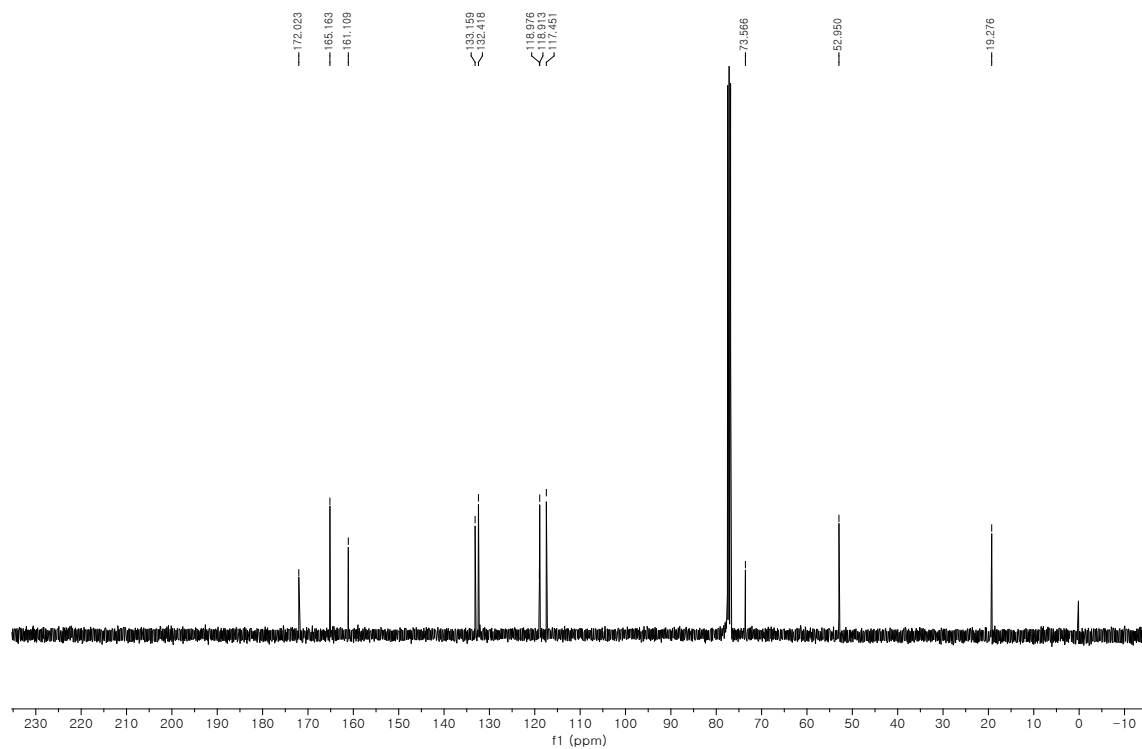

Compound 3 (100 MHz, CDCl<sub>3</sub>)

## HPLC result

Chiralpak<sup>®</sup> IA column, *n*-Hexane : *i*-PrOH = 90:10, Flow rate = 1.0 ml/min

### *Rac*-3

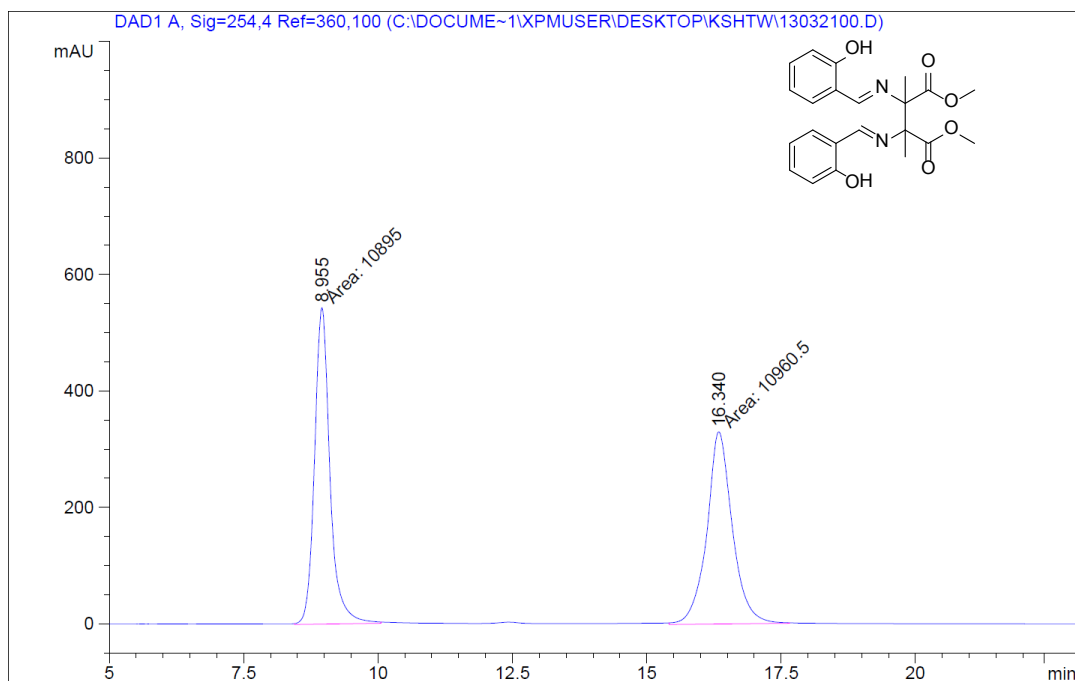

### *(R,R)*-3

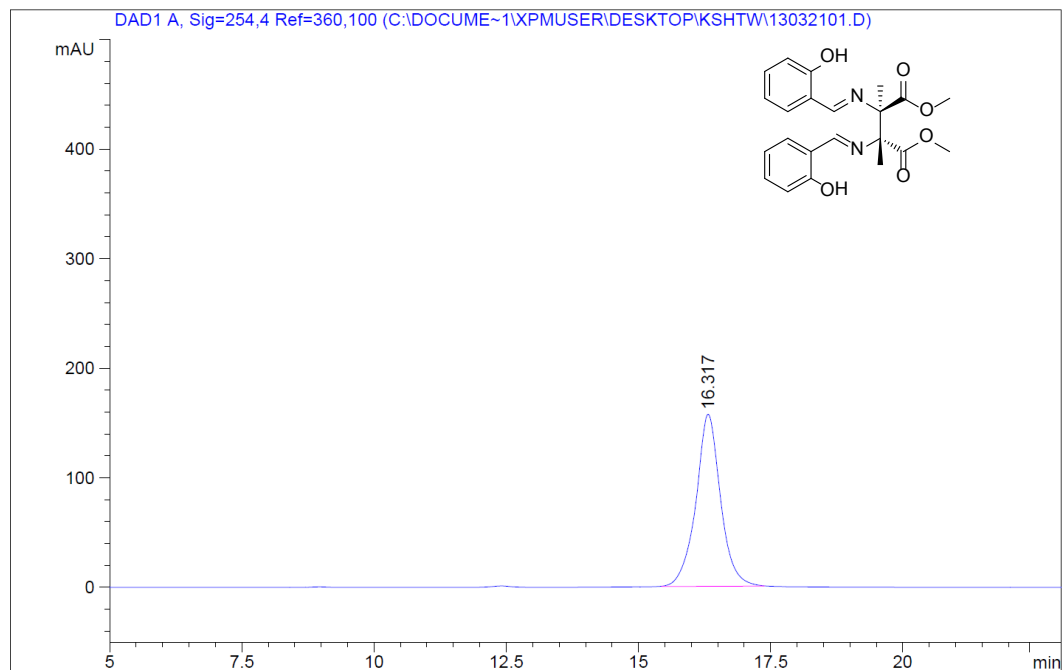

**(S,S)-3**

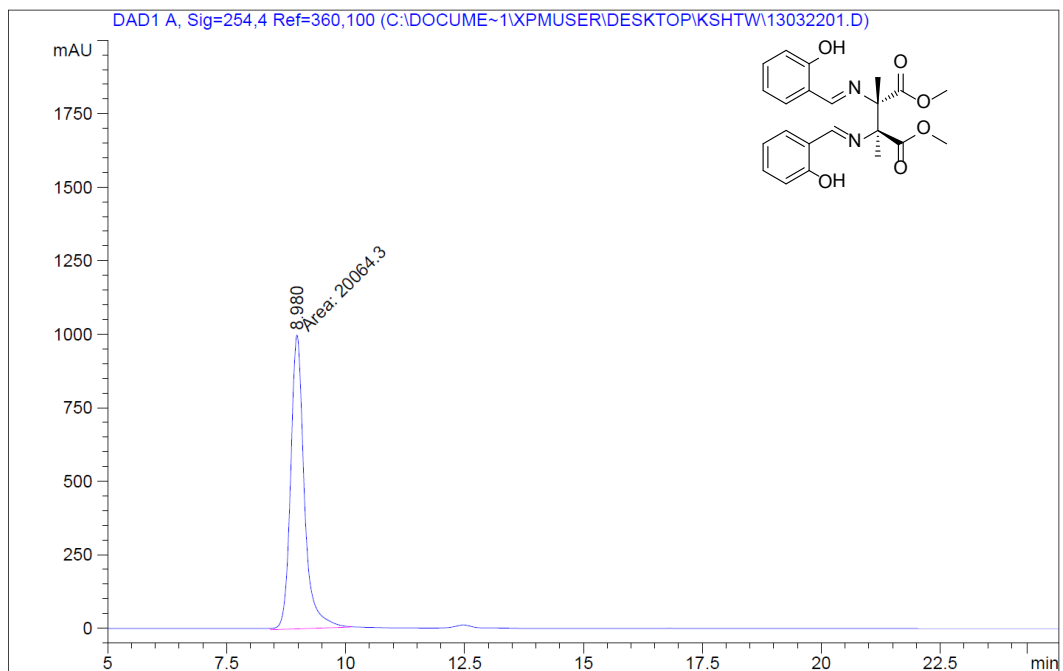

## Calculation result

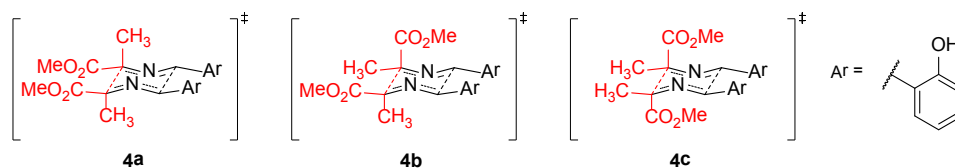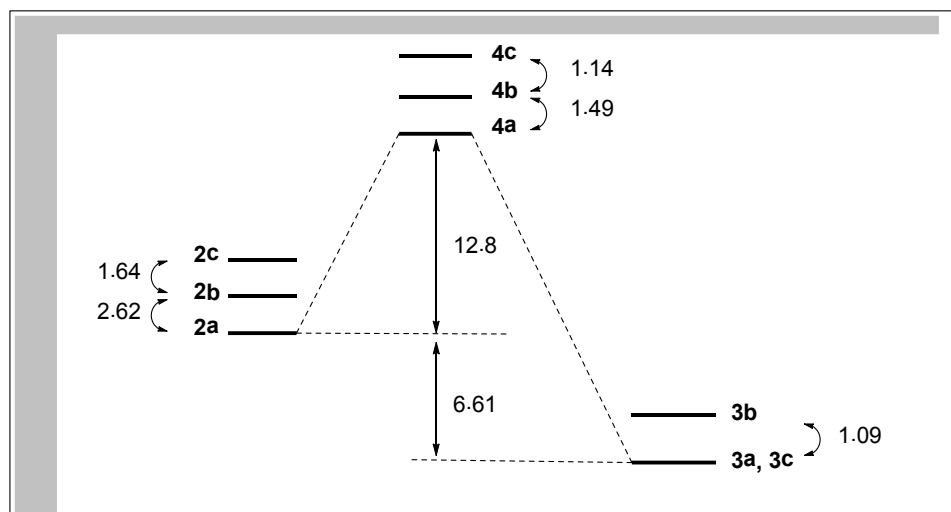

Enthalpy values in kcal/mol.

| Molecules | Energy (hartree) | E+ZPVE (hartree) | $\Delta H_{298.15K}$ (hartree) | Imaginary frequency ( $\text{cm}^{-1}$ ) |
|-----------|------------------|------------------|--------------------------------|------------------------------------------|
| 2a        | -1413.627618     | -1413.194171     | -1413.164382                   |                                          |
| 2b        | -1413.624778     | -1413.190705     | -1413.160212                   |                                          |
| 2c        | -1413.621111     | -1413.187197     | -1413.157592                   |                                          |
| 3a, 3c    | -1413.638968     | -1413.204239     | -1413.174917                   |                                          |
| 3b        | -1413.636684     | -1413.203042     | -1413.173175                   |                                          |
| 4a        | -1413.605623     | -1413.173733     | -1413.144003                   | <i>i</i> 265.644                         |
| 4b        | -1413.603385     | -1413.171061     | -1413.141625                   | <i>i</i> 277.903                         |
| 4c        | -1413.601180     | -1413.169660     | -1413.139813                   | <i>i</i> 277.864                         |

B3LYP/6-31G (d) level



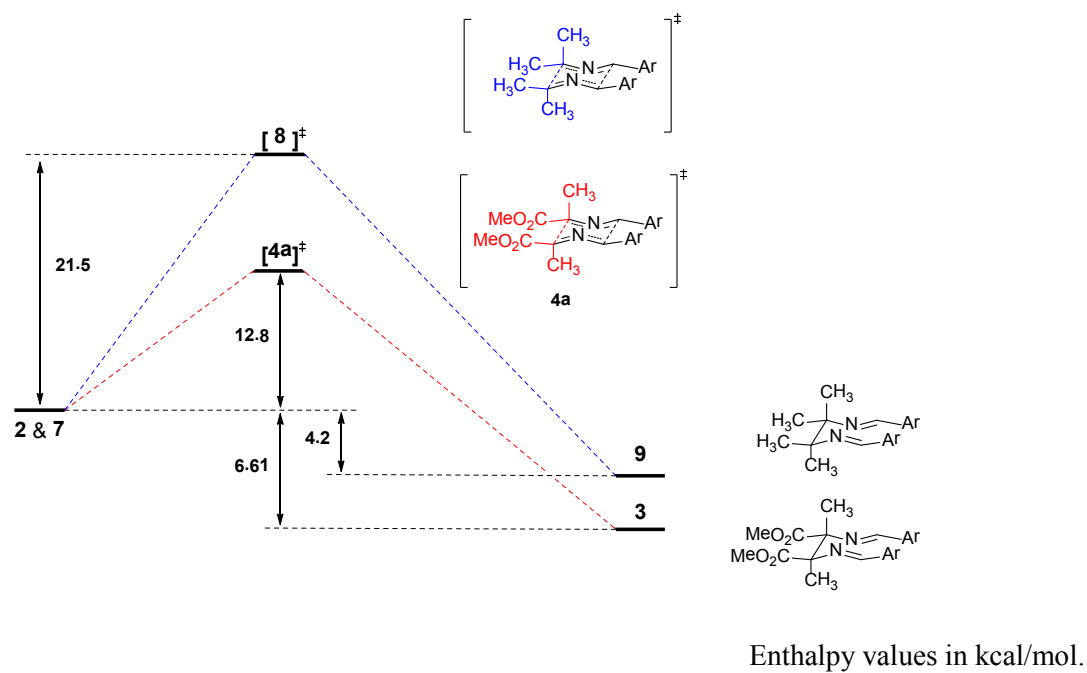

| Molecules | Energy (hartree) | E+ZPVE (hartree) | $\Delta H_{298.15K}$ (hartree) | Imaginary frequency ( $\text{cm}^{-1}$ ) |
|-----------|------------------|------------------|--------------------------------|------------------------------------------|
| 2         | -1413.627618     | -1413.194171     | -1413.164382                   |                                          |
| 3         | -1413.638968     | -1413.204239     | -1413.174917                   |                                          |
| 4a        | -1413.605623     | -1413.173733     | -1413.144003                   | <i>i</i> 265.644                         |
| 7         | -1036.526725     | -1036.122058     | -1036.097803                   |                                          |
| 8         | -1036.488949     | -1036.087035     | -1036.063595                   | <i>i</i> 254.482                         |
| 9         | -1036.532881     | -1036.127726     | -1036.104496                   |                                          |

B3LYP/6-31G (d) level

### The effect of para-substituents on acetophenone

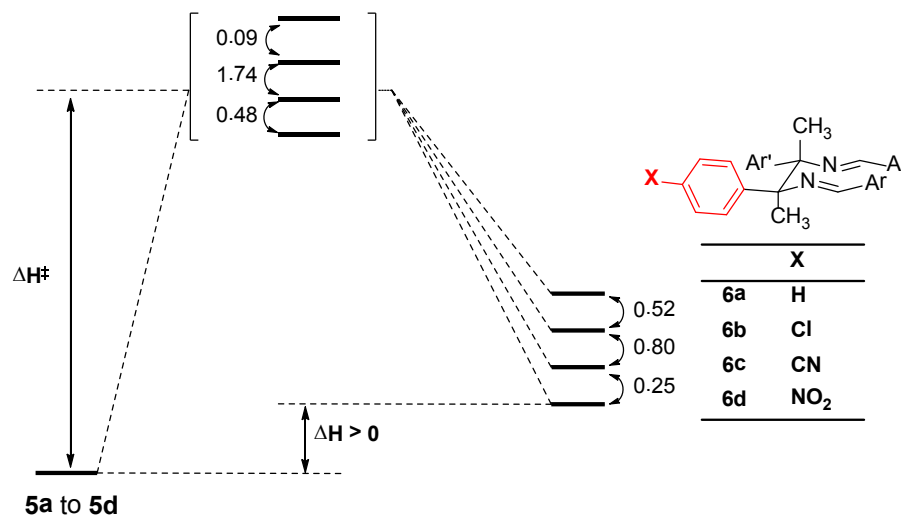

Enthalpy values in kcal/mol.

| Molecules                         | Energy<br>(hartree) | E+ZPVE<br>(hartree) | $\Delta H_{298.15K}$<br>(hartree) | $\Delta H^\ddagger$ (kcal/mol) |
|-----------------------------------|---------------------|---------------------|-----------------------------------|--------------------------------|
|                                   |                     |                     |                                   | $\Delta H$ (kcal/mol)          |
| <b>5a</b>                         | -1419.999729        | -1419.488580        | -1419.458128                      | 16.1                           |
| <b>H</b> <b>TS-a</b>              | -1419.969228        | -1419.461794        | -1419.432493                      | 5.09                           |
| <b>6a</b>                         | -1419.990193        | -1419.479841        | -1419.450020                      | 16.0                           |
| <b>5b</b>                         | -2339.191082        | -2338.699175        | -2338.666259                      | 16.0                           |
| <b>Cl</b> <b>TS-b</b>             | -2339.161835        | -2338.673315        | -2338.640794                      | 4.56                           |
| <b>6b</b>                         | -2339.182350        | -2338.69132         | -2338.658987                      | 14.2                           |
| <b>5c</b>                         | -1604.483396        | -1603.975129        | -1603.940979                      | 14.2                           |
| <b>CN</b> <b>TS-c</b>             | -1604.457011        | -1603.951937        | -1603.918286                      | 3.77                           |
| <b>6c</b>                         | -1604.475962        | -1603.968511        | -1603.934976                      | 13.8                           |
| <b>5d</b>                         | -1828.999027        | -1828.482670        | -1828.447075                      | 13.8                           |
| <b>NO<sub>2</sub></b> <b>TS-d</b> | -1828.973518        | -1828.460264        | -1828.425153                      | 3.52                           |
| <b>6d</b>                         | -1828.992002        | -1828.476485        | -1828.441466                      | 3.52                           |

B3LYP/6-31G (d) level

**\*Additional comment about calculation.\***

Organic chemistry textbooks shows that the 1,3-diaxial strain is greater for methane than for esters. Thus it should be better to have the ester in the axial position than have the methyl in the axial. However, we need to be careful when extending this to systems with many substituents.

Molecular mechanics computation shows that **A** is more stable than **B** as expected from the individual 1,3-diaxial strain.

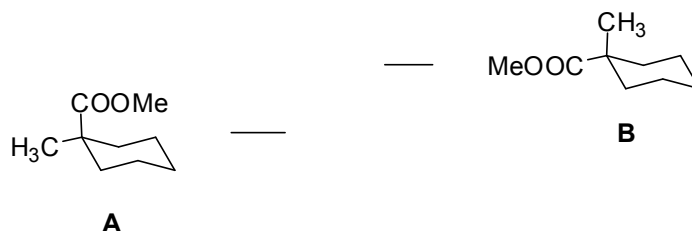

Furthermore, computation shows that **A'** is more stable than **B'** as expected.

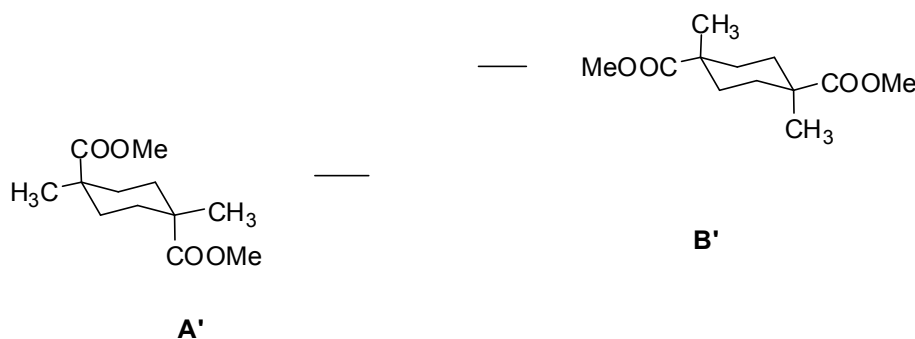

However, when we bring the substituents closer together the trend is reversed! Here it is better to have the carboxylates together in the equatorial positions (**B''**) than to have the methyls together in the equatorial positions (**A''**).

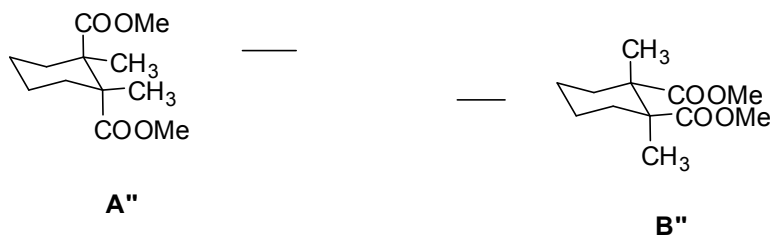

Further analysis below shows that in 1,2-disubstituted cyclohexanes, it is better to have carboxylates together than to have methyls together.

Computation shows that 1,2-dimethyl cyclohexane is less stable than 1,4-dimethyl cyclohexane due apparently to greater steric effect (gauche interaction) when the two methyl groups are closer.

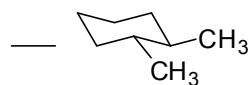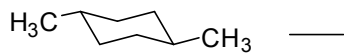

The gap is reduced significantly for the dicarboxylates. Indeed, the 1,2-disubstituted carboxylate is more stable than the 1,4-disubstituted one. Thus there appears to be even energetically favorable interactions between the two carboxylates.

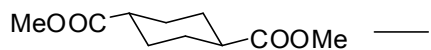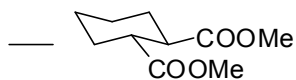

The energy gap increases in case of the t-butyl substituent as shown below.

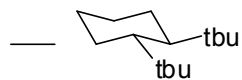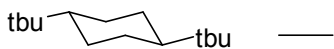

### Atom coordinates

| Atom coordinates of 2* |          |          |          |
|------------------------|----------|----------|----------|
| c                      | X        | Y        | Z        |
| N                      | -0.24177 | -1.35358 | -0.48556 |
| C                      | 1.042863 | 1.316444 | -1.47721 |
| C                      | 0.466833 | 0.648199 | 0.766609 |
| N                      | 0.241774 | 1.353577 | -0.48556 |
| C                      | -0.46683 | -0.6482  | 0.766609 |
| C                      | -1.04286 | -1.31644 | -1.47721 |
| H                      | 1.495352 | 0.293007 | 0.884003 |
| H                      | -1.49535 | -0.29301 | 0.884003 |
| C                      | -2.35601 | -0.59046 | -1.61161 |
| H                      | -3.0866  | -1.21471 | -2.13051 |
| H                      | -2.19377 | 0.313962 | -2.21322 |
| H                      | -2.76315 | -0.27786 | -0.64934 |
| C                      | 2.356012 | 0.590463 | -1.61161 |
| H                      | 3.086596 | 1.21471  | -2.13051 |
| H                      | 2.193766 | -0.31396 | -2.21322 |
| H                      | 2.763146 | 0.277862 | -0.64934 |
| C                      | 0.522307 | 2.067422 | -2.69777 |
| O                      | -0.65084 | 2.265437 | -2.93179 |
| O                      | 1.526077 | 2.47701  | -3.49421 |
| C                      | 1.123997 | 3.201433 | -4.67159 |
| H                      | 0.561345 | 4.095556 | -4.39263 |
| H                      | 0.500102 | 2.5706   | -5.30993 |
| H                      | 2.050579 | 3.468551 | -5.17923 |
| C                      | -0.52231 | -2.06742 | -2.69777 |
| O                      | 0.65084  | -2.26544 | -2.93179 |
| O                      | -1.52608 | -2.47701 | -3.49421 |
| C                      | -1.124   | -3.20143 | -4.67159 |
| H                      | -0.5001  | -2.5706  | -5.30993 |
| H                      | -2.05058 | -3.46855 | -5.17923 |
| H                      | -0.56135 | -4.09556 | -4.39263 |
| C                      | 0.103507 | 1.557714 | 1.926088 |
| C                      | -0.61968 | 3.117447 | 4.144251 |
| C                      | 0.904175 | 1.592081 | 3.072466 |

|   |          |          |          |
|---|----------|----------|----------|
| C | -1.06853 | 2.347265 | 1.892026 |
| C | -1.42318 | 3.11517  | 3.007061 |
| C | 0.55469  | 2.362295 | 4.180722 |
| H | 1.808681 | 0.988828 | 3.097002 |
| H | -2.32931 | 3.710581 | 2.95029  |
| H | 1.189486 | 2.368815 | 5.061779 |
| H | -0.90638 | 3.722104 | 5.000882 |
| C | -0.10351 | -1.55771 | 1.926088 |
| C | 0.619679 | -3.11745 | 4.144251 |
| C | -0.90418 | -1.59208 | 3.072466 |
| C | 1.068531 | -2.34727 | 1.892026 |
| C | 1.423176 | -3.11517 | 3.007061 |
| C | -0.55469 | -2.3623  | 4.180722 |
| H | -1.80868 | -0.98883 | 3.097002 |
| H | 2.329313 | -3.71058 | 2.95029  |
| H | -1.18949 | -2.36882 | 5.061779 |
| H | 0.906379 | -3.7221  | 5.000882 |
| O | -1.89766 | 2.377882 | 0.809834 |
| H | -1.356   | 2.127723 | 0.022888 |
| O | 1.897664 | -2.37788 | 0.809834 |
| H | 1.355997 | -2.12772 | 0.022888 |

\* Calculation was performed using *(S,S)*-*hpen*.

Atom coordinates of **3**

| Atom | X        | Y        | Z        |
|------|----------|----------|----------|
| N    | 0.286684 | 1.442507 | 0.313175 |
| C    | -0.88507 | -1.3394  | -0.82129 |
| C    | -0.58063 | -0.57537 | 1.441142 |
| N    | -0.28668 | -1.44251 | 0.313175 |
| C    | 0.580634 | 0.575371 | 1.441142 |
| C    | 0.885065 | 1.339397 | -0.82129 |
| C    | 0.529141 | 2.196396 | -1.9406  |
| C    | -0.1365  | 3.802427 | -4.13545 |
| C    | 1.192229 | 2.044803 | -3.17386 |
| C    | -0.48895 | 3.184317 | -1.81951 |
| C    | -0.80854 | 3.978239 | -2.93291 |
| C    | 0.870953 | 2.834086 | -4.26722 |
| H    | 1.967406 | 1.285705 | -3.25614 |

|   |          |          |          |
|---|----------|----------|----------|
| H | -1.58744 | 4.725739 | -2.82053 |
| H | 1.390372 | 2.704634 | -5.21163 |
| H | -0.39694 | 4.427812 | -4.98562 |
| C | -0.52914 | -2.1964  | -1.9406  |
| C | 0.136502 | -3.80243 | -4.13545 |
| C | 0.488952 | -3.18432 | -1.81951 |
| C | -1.19223 | -2.0448  | -3.17386 |
| C | -0.87095 | -2.83409 | -4.26722 |
| C | 0.808541 | -3.97824 | -2.93291 |
| H | -1.96741 | -1.28571 | -3.25614 |
| H | -1.39037 | -2.70463 | -5.21163 |
| H | 1.587439 | -4.72574 | -2.82053 |
| H | 0.396938 | -4.42781 | -4.98562 |
| O | -1.16331 | 3.387697 | -0.67807 |
| H | -0.78057 | 2.777447 | 0.016835 |
| O | 1.163313 | -3.3877  | -0.67807 |
| H | 0.780574 | -2.77745 | 0.016835 |
| C | 1.988374 | -0.04773 | 1.428281 |
| H | 2.73928  | 0.744324 | 1.338706 |
| H | 2.102857 | -0.74298 | 0.594875 |
| H | 2.18371  | -0.6031  | 2.344317 |
| C | -1.98837 | 0.047729 | 1.428281 |
| H | -2.10286 | 0.742983 | 0.594875 |
| H | -2.18371 | 0.603098 | 2.344317 |
| H | -2.73928 | -0.74432 | 1.338706 |
| C | 0.37402  | 1.469844 | 2.691243 |
| C | -0.37402 | -1.46984 | 2.691243 |
| O | 0.347911 | -2.43967 | 2.733637 |
| O | -0.34791 | 2.439666 | 2.733637 |
| O | 1.087963 | 1.033561 | 3.748568 |
| O | -1.08796 | -1.03356 | 3.748568 |
| C | -0.90462 | -1.78801 | 4.959772 |
| H | -1.21891 | -2.82431 | 4.81351  |
| H | -1.53045 | -1.29744 | 5.705619 |
| H | 0.145974 | -1.7729  | 5.260462 |
| C | 0.904616 | 1.788008 | 4.959772 |
| H | 1.218909 | 2.824311 | 4.81351  |
| H | 1.530449 | 1.297439 | 5.705619 |

|                                 |          |          |          |
|---------------------------------|----------|----------|----------|
| H                               | -0.14597 | 1.772903 | 5.260462 |
| H                               | -1.68325 | -0.61169 | -1.00325 |
| H                               | 1.683253 | 0.61169  | -1.00325 |
| <hr/>                           |          |          |          |
| <hr/>                           |          |          |          |
| Atom coordinates of <b>4a</b> * |          |          |          |
| <hr/>                           |          |          |          |
| Atom                            | X        | Y        | Z        |
| <hr/>                           |          |          |          |
| N                               | -0.62714 | -1.29552 | -0.39519 |
| C                               | 1.147043 | 0.7949   | -1.48369 |
| C                               | 0.796956 | 0.769905 | 0.848834 |
| N                               | 0.627143 | 1.295518 | -0.39519 |
| C                               | -0.79696 | -0.76991 | 0.848834 |
| C                               | -1.14704 | -0.7949  | -1.48369 |
| H                               | 1.583618 | 0.036324 | 1.028889 |
| H                               | -1.58362 | -0.03632 | 1.028889 |
| C                               | -2.20101 | 0.279044 | -1.54794 |
| H                               | -2.17527 | 0.799833 | -2.5047  |
| H                               | -2.07608 | 1.018572 | -0.75465 |
| H                               | -3.19647 | -0.17493 | -1.44105 |
| C                               | 2.201012 | -0.27904 | -1.54794 |
| H                               | 2.17527  | -0.79983 | -2.5047  |
| H                               | 2.076082 | -1.01857 | -0.75465 |
| H                               | 3.196466 | 0.174933 | -1.44105 |
| C                               | 0.75335  | 1.545782 | -2.72753 |
| O                               | -0.04067 | 2.464158 | -2.76179 |
| O                               | 1.394854 | 1.074632 | -3.82067 |
| C                               | 1.087992 | 1.75887  | -5.04679 |
| H                               | 1.339989 | 2.819275 | -4.96521 |
| H                               | 0.024232 | 1.663908 | -5.27974 |
| H                               | 1.69705  | 1.275648 | -5.81116 |
| C                               | -0.75335 | -1.54578 | -2.72753 |
| O                               | 0.040672 | -2.46416 | -2.76179 |
| O                               | -1.39485 | -1.07463 | -3.82067 |
| C                               | -1.08799 | -1.75887 | -5.04679 |
| H                               | -0.02423 | -1.66391 | -5.27974 |
| H                               | -1.69705 | -1.27565 | -5.81116 |
| H                               | -1.33999 | -2.81928 | -4.96521 |
| C                               | 0.429363 | 1.602886 | 1.991292 |



|   |          |          |          |
|---|----------|----------|----------|
| C | -0.29161 | 3.105111 | 4.254108 |
| C | 0.952852 | 1.300902 | 3.263516 |
| C | -0.47271 | 2.697907 | 1.870531 |
| C | -0.82658 | 3.429534 | 3.01129  |
| C | 0.6087   | 2.04135  | 4.387175 |
| H | 1.642879 | 0.466186 | 3.352799 |
| H | -1.51621 | 4.258946 | 2.88956  |
| H | 1.031816 | 1.793406 | 5.355685 |
| H | -0.57163 | 3.692636 | 5.124592 |
| C | -0.42936 | -1.60289 | 1.991292 |
| C | 0.291613 | -3.10511 | 4.254108 |
| C | -0.95285 | -1.3009  | 3.263516 |
| C | 0.472708 | -2.69791 | 1.870531 |
| C | 0.826581 | -3.42953 | 3.01129  |
| C | -0.6087  | -2.04135 | 4.387175 |
| H | -1.64288 | -0.46619 | 3.352799 |
| H | 1.516207 | -4.25895 | 2.88956  |
| H | -1.03182 | -1.79341 | 5.355685 |
| H | 0.571629 | -3.69264 | 5.124592 |
| O | -1.02621 | 3.064014 | 0.692748 |
| H | -0.5298  | 2.605479 | -0.0358  |
| O | 1.026213 | -3.06401 | 0.692748 |
| H | 0.529801 | -2.60548 | -0.0358  |

\* Calculation was performed using *(S,S)*-*hpen*.

Atom coordinates of **4b**

| Atom | X        | Y        | Z        |
|------|----------|----------|----------|
| N    | -0.73    | 0.788997 | 0.907515 |
| C    | 0.815364 | -0.82615 | -0.7373  |
| C    | -1.47276 | -1.51492 | -0.87642 |
| N    | -0.22163 | -1.70125 | -0.53943 |
| C    | -1.6524  | 0.034982 | 1.438761 |
| C    | 0.603008 | 0.522134 | 0.991217 |
| H    | 0.689228 | -0.01462 | -1.44604 |
| H    | 0.962662 | -0.22868 | 1.696164 |
| C    | 1.537798 | 1.604867 | 0.699715 |
| C    | 3.429887 | 3.611424 | 0.157    |
| C    | 1.160996 | 2.768298 | -0.03172 |

|   |          |          |          |
|---|----------|----------|----------|
| C | 2.870572 | 1.492812 | 1.145549 |
| C | 3.812059 | 2.479624 | 0.888753 |
| C | 2.124081 | 3.753865 | -0.29711 |
| H | 3.153416 | 0.605246 | 1.705603 |
| H | 4.830881 | 2.370578 | 1.247522 |
| H | 1.810445 | 4.628554 | -0.85816 |
| H | 4.156257 | 4.391863 | -0.05502 |
| C | 2.172384 | -1.34265 | -0.56169 |
| C | 4.824519 | -2.20979 | -0.22047 |
| C | 3.244847 | -0.66264 | -1.17031 |
| C | 2.461761 | -2.48825 | 0.229386 |
| C | 3.787174 | -2.90348 | 0.397781 |
| C | 4.558396 | -1.08911 | -1.01491 |
| H | 3.023508 | 0.214345 | -1.77229 |
| H | 3.975718 | -3.78175 | 1.007444 |
| H | 5.367477 | -0.55255 | -1.50093 |
| H | 5.84783  | -2.55145 | -0.08776 |
| C | -3.05205 | 0.515654 | 1.168266 |
| O | -3.33556 | 1.516768 | 0.542609 |
| O | -3.98008 | -0.31403 | 1.702009 |
| C | -5.34611 | 0.068028 | 1.467249 |
| H | -5.55951 | 0.067821 | 0.395378 |
| H | -5.5389  | 1.065033 | 1.870803 |
| H | -5.95032 | -0.68044 | 1.980221 |
| C | -1.40743 | -1.08258 | 2.422312 |
| H | -0.55659 | -1.70476 | 2.130997 |
| H | -2.28776 | -1.71649 | 2.52916  |
| H | -1.18151 | -0.65814 | 3.411472 |
| O | -0.08409 | 2.981662 | -0.494   |
| H | -0.67878 | 2.267982 | -0.15339 |
| O | 1.48467  | -3.1979  | 0.845378 |
| H | 0.62822  | -2.90042 | 0.439392 |
| C | -2.45701 | -2.62167 | -0.58482 |
| H | -3.32555 | -2.25443 | -0.03022 |
| H | -1.96516 | -3.40963 | -0.00991 |
| H | -2.8377  | -3.05371 | -1.51874 |
| C | -1.94184 | -0.36268 | -1.72256 |
| O | -1.23269 | 0.495778 | -2.21215 |

|   |          |          |          |
|---|----------|----------|----------|
| O | -3.28065 | -0.40207 | -1.8941  |
| C | -3.83105 | 0.707943 | -2.63188 |
| H | -3.63489 | 1.638182 | -2.09579 |
| H | -4.9019  | 0.511666 | -2.69026 |
| H | -3.39179 | 0.755623 | -3.63107 |

---

Atom coordinates of **4c<sup>\*</sup>**

---

| Atom | X        | Y        | Z        |
|------|----------|----------|----------|
| N    | -0.71292 | -1.16717 | 0.890635 |
| C    | -1.90642 | 0.711928 | -1.1781  |
| C    | 0.464873 | 0.478675 | -0.98034 |
| N    | -0.71307 | 1.166901 | -0.89012 |
| C    | 0.464968 | -0.47883 | 0.980837 |
| C    | -1.90628 | -0.71225 | 1.178497 |
| H    | 0.48667  | -0.47052 | -1.50756 |
| H    | 0.486684 | 0.47033  | 1.508124 |
| C    | 1.700372 | 1.260405 | -0.98848 |
| C    | 4.128858 | 2.675382 | -1.08166 |
| C    | 2.870936 | 0.668796 | -1.50305 |
| C    | 1.775974 | 2.596517 | -0.50444 |
| C    | 2.995302 | 3.285681 | -0.55609 |
| C    | 4.073443 | 1.360367 | -1.56025 |
| H    | 2.814753 | -0.35414 | -1.86582 |
| H    | 3.018164 | 4.305437 | -0.18451 |
| H    | 4.958845 | 0.88388  | -1.96971 |
| H    | 5.062911 | 3.229961 | -1.12236 |
| C    | 1.700587 | -1.26036 | 0.988755 |
| C    | 4.129504 | -2.67479 | 1.080963 |
| C    | 2.871127 | -0.66855 | 1.503151 |
| C    | 1.7764   | -2.59641 | 0.504498 |
| C    | 2.995957 | -3.2853  | 0.555615 |
| C    | 4.073833 | -1.35984 | 1.559883 |
| H    | 2.81475  | 0.354332 | 1.866154 |
| H    | 3.019023 | -4.30501 | 0.18376  |
| H    | 4.959209 | -0.88319 | 1.969202 |
| H    | 5.06374  | -3.22915 | 1.121235 |
| O    | 0.712104 | 3.245028 | 0.012893 |

|   |          |          |          |
|---|----------|----------|----------|
| H | -0.08172 | 2.672251 | -0.13487 |
| O | 0.712505 | -3.24512 | -0.01252 |
| H | -0.08131 | -2.67239 | 0.135149 |
| C | -3.07272 | -1.6576  | 1.016096 |
| H | -3.42727 | -2.00427 | 1.994897 |
| H | -2.75602 | -2.52414 | 0.431282 |
| H | -3.92513 | -1.17781 | 0.525732 |
| C | -3.07293 | 1.657187 | -1.01584 |
| H | -3.92533 | 1.177273 | -0.52575 |
| H | -3.42729 | 2.003933 | -1.99461 |
| H | -2.75656 | 2.523599 | -0.43087 |
| C | -2.14519 | 0.5796   | 1.906678 |
| O | -3.44249 | 0.687206 | 2.281359 |
| C | -3.76348 | 1.864755 | 3.042144 |
| H | -3.58152 | 2.765239 | 2.449619 |
| H | -3.15596 | 1.909017 | 3.949756 |
| H | -4.82134 | 1.771809 | 3.288891 |
| O | -1.31284 | 1.427805 | 2.171074 |
| C | -2.14517 | -0.5799  | -1.90639 |
| O | -1.31274 | -1.4283  | -2.17013 |
| O | -3.44239 | -0.68725 | -2.28197 |
| C | -3.76312 | -1.86452 | -3.04329 |
| H | -3.58415 | -2.76512 | -2.44991 |
| H | -3.1532  | -1.91001 | -3.94922 |
| H | -4.82022 | -1.77009 | -3.29293 |

\* Calculation was performed using *(S,S)*-*hpen*.

Atom coordinates of **5a**

| Atom | X        | Y        | Z        |
|------|----------|----------|----------|
| N    | -0.27169 | -1.36129 | 0.14372  |
| C    | 0.487411 | 0.62356  | -1.09985 |
| C    | 1.164592 | 1.453148 | 1.060243 |
| N    | 0.271692 | 1.36129  | 0.14372  |
| C    | -1.16459 | -1.45315 | 1.060243 |
| C    | -0.48741 | -0.62356 | -1.09985 |
| H    | 1.503932 | 0.227466 | -1.18968 |
| H    | -1.50393 | -0.22747 | -1.18968 |
| C    | -0.20317 | -1.54253 | -2.28003 |

|   |          |          |          |
|---|----------|----------|----------|
| C | 0.364944 | -3.13429 | -4.52546 |
| C | 0.895899 | -2.43134 | -2.26942 |
| C | -1.01054 | -1.49472 | -3.42166 |
| C | -0.73881 | -2.279   | -4.54194 |
| C | 1.174904 | -3.21448 | -3.39533 |
| H | -1.85912 | -0.81472 | -3.43372 |
| H | -1.379   | -2.21904 | -5.41718 |
| H | 2.027467 | -3.88571 | -3.3538  |
| H | 0.59152  | -3.75092 | -5.3916  |
| C | 0.203173 | 1.542531 | -2.28003 |
| C | -0.36494 | 3.134287 | -4.52546 |
| C | 1.010536 | 1.494723 | -3.42166 |
| C | -0.8959  | 2.43134  | -2.26942 |
| C | -1.1749  | 3.214483 | -3.39533 |
| C | 0.738805 | 2.278997 | -4.54194 |
| H | 1.859115 | 0.814719 | -3.43372 |
| H | -2.02747 | 3.885714 | -3.3538  |
| H | 1.379002 | 2.21904  | -5.41718 |
| H | -0.59152 | 3.750921 | -5.3916  |
| C | -2.54254 | -0.81784 | 0.976784 |
| H | -3.15978 | -1.07192 | 1.839104 |
| H | -3.06403 | -1.17581 | 0.081989 |
| H | -2.47461 | 0.272314 | 0.899839 |
| O | 1.716923 | -2.55545 | -1.18632 |
| H | 1.215661 | -2.17971 | -0.41822 |
| O | -1.71692 | 2.555454 | -1.18632 |
| H | -1.21566 | 2.17971  | -0.41822 |
| C | 2.542544 | 0.817836 | 0.976784 |
| H | 2.474605 | -0.27231 | 0.899839 |
| H | 3.064026 | 1.175805 | 0.081989 |
| H | 3.159784 | 1.071921 | 1.839104 |
| C | -0.81832 | -2.2557  | 2.270507 |
| C | -0.10683 | -3.7527  | 4.542481 |
| C | 0.050344 | -3.35553 | 2.161345 |
| C | -1.32403 | -1.92135 | 3.536702 |
| C | -0.96274 | -2.65774 | 4.664929 |
| C | 0.395898 | -4.10035 | 3.285817 |
| H | 0.438687 | -3.62869 | 1.185392 |

|   |          |          |          |
|---|----------|----------|----------|
| H | -1.98032 | -1.06407 | 3.652328 |
| H | -1.35195 | -2.37472 | 5.63911  |
| H | 1.056379 | -4.9569  | 3.180938 |
| H | 0.164754 | -4.33453 | 5.419229 |
| C | 0.818323 | 2.255704 | 2.270507 |
| C | 0.106832 | 3.752704 | 4.542481 |
| C | -0.05034 | 3.355528 | 2.161345 |
| C | 1.324028 | 1.92135  | 3.536702 |
| C | 0.962736 | 2.65774  | 4.664929 |
| C | -0.3959  | 4.100349 | 3.285817 |
| H | -0.43869 | 3.628685 | 1.185392 |
| H | 1.980322 | 1.064066 | 3.652328 |
| H | 1.351951 | 2.374724 | 5.63911  |
| H | -1.05638 | 4.956899 | 3.180938 |
| H | -0.16475 | 4.334533 | 5.419229 |

---

Atom coordinates of **TS-a**

---

| Atom | X        | Y        | Z        |
|------|----------|----------|----------|
| N    | -0.02642 | -1.40097 | 0.621237 |
| C    | -1.25056 | 1.044813 | -0.96086 |
| C    | 1.100548 | 0.76202  | -1.02838 |
| N    | -0.02538 | 1.402803 | -0.62472 |
| C    | 1.099184 | -0.76117 | 1.027624 |
| C    | -1.25123 | -1.04329 | 0.959103 |
| H    | -1.43796 | 0.259848 | -1.69596 |
| H    | -1.43757 | -0.25931 | 1.695569 |
| C    | -2.41252 | -1.77844 | 0.50447  |
| C    | -4.71146 | -3.16108 | -0.33953 |
| C    | -2.31816 | -2.8234  | -0.45971 |
| C    | -3.68674 | -1.45837 | 1.019909 |
| C    | -4.82597 | -2.1368  | 0.610409 |
| C    | -3.4713  | -3.50058 | -0.87221 |
| H    | -3.76243 | -0.66143 | 1.755485 |
| H    | -5.79566 | -1.8751  | 1.022684 |
| H    | -3.36601 | -4.29113 | -1.60863 |
| H    | -5.59742 | -3.69933 | -0.66623 |
| C    | -2.41157 | 1.780219 | -0.50595 |

|   |          |          |          |
|---|----------|----------|----------|
| C | -4.71042 | 3.161266 | 0.340993 |
| C | -3.68633 | 1.45858  | -1.01916 |
| C | -2.31665 | 2.826271 | 0.457136 |
| C | -3.46967 | 3.502651 | 0.871165 |
| C | -4.8255  | 2.136193 | -0.60812 |
| H | -3.76263 | 0.660841 | -1.75383 |
| H | -3.36386 | 4.293978 | 1.606795 |
| H | -5.79565 | 1.873023 | -1.0184  |
| H | -5.59639 | 3.698705 | 0.669034 |
| C | 1.046773 | 0.330972 | 2.070037 |
| H | 1.902663 | 1.003467 | 1.992847 |
| H | 1.053173 | -0.10545 | 3.079342 |
| H | 0.153455 | 0.949469 | 1.973089 |
| O | -1.13383 | -3.16947 | -1.00689 |
| H | -0.44214 | -2.62593 | -0.53591 |
| O | -1.13157 | 3.173771 | 1.00208  |
| H | -0.44046 | 2.631875 | 0.528017 |
| C | 1.052567 | -0.3326  | -2.06859 |
| H | 1.893948 | -1.02089 | -1.96717 |
| H | 1.092456 | 0.099314 | -3.07912 |
| H | 0.145991 | -0.93473 | -1.9921  |
| C | 2.370009 | 1.479218 | -0.81089 |
| C | 4.810984 | 2.87486  | -0.4266  |
| C | 3.596978 | 0.961603 | -1.28089 |
| C | 2.410624 | 2.725772 | -0.14313 |
| C | 3.607964 | 3.405614 | 0.049591 |
| C | 4.793793 | 1.651768 | -1.09541 |
| H | 3.625129 | 0.010446 | -1.79839 |
| H | 1.48922  | 3.178215 | 0.20006  |
| H | 3.599171 | 4.363675 | 0.562567 |
| H | 5.718103 | 1.223688 | -1.47482 |
| H | 5.744913 | 3.411613 | -0.28307 |
| C | 2.368427 | -1.47925 | 0.811635 |
| C | 4.807471 | -2.87911 | 0.429331 |
| C | 2.406792 | -2.72971 | 0.150536 |
| C | 3.597145 | -0.95969 | 1.2755   |
| C | 4.792757 | -1.65198 | 1.091236 |
| C | 3.603165 | -3.4115  | -0.04137 |

|   |          |          |          |
|---|----------|----------|----------|
| H | 1.484095 | -3.18388 | -0.18706 |
| H | 3.627953 | -0.00503 | 1.786725 |
| H | 5.718077 | -1.22247 | 1.466238 |
| H | 3.592492 | -4.37242 | -0.5491  |
| H | 5.740504 | -3.41748 | 0.286801 |

Atom coordinates of **6a**

| Atom | X        | Y        | Z        |
|------|----------|----------|----------|
| N    | 1.37913  | -0.10669 | -0.32641 |
| C    | -2.53948 | 0.601366 | -0.57742 |
| C    | -0.66728 | 0.453836 | 0.922866 |
| N    | -1.37913 | 0.106694 | -0.32641 |
| C    | 0.667283 | -0.45384 | 0.922866 |
| C    | 2.539483 | -0.60137 | -0.57742 |
| H    | -3.0579  | 1.254985 | 0.137267 |
| H    | 3.057896 | -1.25499 | 0.137267 |
| C    | 3.255815 | -0.31566 | -1.81165 |
| C    | 4.686178 | 0.220582 | -4.15851 |
| C    | 2.697294 | 0.526662 | -2.81253 |
| C    | 4.530766 | -0.87317 | -2.02294 |
| C    | 5.248103 | -0.61538 | -3.18163 |
| C    | 3.429541 | 0.785761 | -3.98151 |
| H    | 4.94894  | -1.51638 | -1.2512  |
| H    | 6.230193 | -1.05329 | -3.33082 |
| H    | 2.985137 | 1.4307   | -4.73295 |
| H    | 5.238836 | 0.430292 | -5.07092 |
| C    | -3.25582 | 0.315655 | -1.81165 |
| C    | -4.68618 | -0.22058 | -4.15851 |
| C    | -4.53077 | 0.873166 | -2.02294 |
| C    | -2.69729 | -0.52666 | -2.81253 |
| C    | -3.42954 | -0.78576 | -3.98151 |
| C    | -5.2481  | 0.615379 | -3.18163 |
| H    | -4.94894 | 1.516377 | -1.2512  |
| H    | -2.98514 | -1.4307  | -4.73295 |
| H    | -6.23019 | 1.053294 | -3.33082 |
| H    | -5.23884 | -0.43029 | -5.07092 |
| C    | 0.297922 | -1.95176 | 0.829053 |



|   |          |          |          |
|---|----------|----------|----------|
| H | -0.22071 | -2.1495  | -0.11119 |
| H | -0.34713 | -2.27513 | 1.647363 |
| H | 1.208003 | -2.55896 | 0.853837 |
| O | 1.485592 | 1.087112 | -2.67335 |
| H | 1.110918 | 0.762388 | -1.80581 |
| O | -1.48559 | -1.08711 | -2.67335 |
| H | -1.11092 | -0.76239 | -1.80581 |
| C | -0.29792 | 1.951764 | 0.829053 |
| H | 0.220712 | 2.149503 | -0.11119 |
| H | 0.347125 | 2.275126 | 1.647363 |
| H | -1.208   | 2.558964 | 0.853837 |
| C | -1.53393 | 0.171662 | 2.168239 |
| C | -3.11811 | -0.35576 | 4.456566 |
| C | -2.495   | -0.85441 | 2.171244 |
| C | -1.38881 | 0.922981 | 3.344567 |
| C | -2.17048 | 0.666465 | 4.472409 |
| C | -3.27426 | -1.11738 | 3.298186 |
| H | -2.651   | -1.44938 | 1.277789 |
| H | -0.6577  | 1.721446 | 3.395009 |
| H | -2.03414 | 1.272231 | 5.3646   |
| H | -4.00984 | -1.91702 | 3.264027 |
| H | -3.7293  | -0.55438 | 5.332954 |
| C | 1.533926 | -0.17166 | 2.168239 |
| C | 3.118113 | 0.355759 | 4.456566 |
| C | 2.494999 | 0.854412 | 2.171244 |
| C | 1.388805 | -0.92298 | 3.344567 |
| C | 2.170481 | -0.66647 | 4.472409 |
| C | 3.274256 | 1.117381 | 3.298186 |
| H | 2.651    | 1.449376 | 1.277789 |
| H | 0.657695 | -1.72145 | 3.395009 |
| H | 2.034142 | -1.27223 | 5.3646   |
| H | 4.009835 | 1.917023 | 3.264027 |
| H | 3.729304 | 0.554384 | 5.332954 |

---

Atom coordinates of **5b**

---

| Atom | X        | Y        | Z        |
|------|----------|----------|----------|
| N    | -0.30662 | -1.35338 | -0.55302 |

|   |          |          |          |
|---|----------|----------|----------|
| C | 0.501264 | 0.611473 | -1.79808 |
| C | 1.213454 | 1.444908 | 0.349546 |
| N | 0.306618 | 1.353377 | -0.55302 |
| C | -1.21345 | -1.44491 | 0.349546 |
| C | -0.50126 | -0.61147 | -1.79808 |
| H | 1.508477 | 0.193468 | -1.89144 |
| H | -1.50848 | -0.19347 | -1.89144 |
| C | -0.23368 | -1.5397  | -2.97508 |
| C | 0.30629  | -3.15035 | -5.21333 |
| C | 0.851491 | -2.44499 | -2.96219 |
| C | -1.04222 | -1.48432 | -4.11559 |
| C | -0.78402 | -2.27805 | -5.23228 |
| C | 1.116893 | -3.23785 | -4.08418 |
| H | -1.88035 | -0.79156 | -4.12978 |
| H | -1.42439 | -2.21245 | -6.10692 |
| H | 1.959087 | -3.92187 | -4.04097 |
| H | 0.521767 | -3.77447 | -6.07683 |
| C | 0.233681 | 1.539698 | -2.97508 |
| C | -0.30629 | 3.150345 | -5.21333 |
| C | 1.042224 | 1.484319 | -4.11559 |
| C | -0.85149 | 2.44499  | -2.96219 |
| C | -1.11689 | 3.237846 | -4.08418 |
| C | 0.784017 | 2.278051 | -5.23228 |
| H | 1.880354 | 0.791555 | -4.12978 |
| H | -1.95909 | 3.921871 | -4.04097 |
| H | 1.424385 | 2.212448 | -6.10692 |
| H | -0.52177 | 3.774473 | -6.07683 |
| C | -2.58381 | -0.79594 | 0.253511 |
| H | -3.21597 | -1.04717 | 1.105708 |
| H | -3.09768 | -1.14357 | -0.64952 |
| H | -2.50327 | 0.293816 | 0.183208 |
| O | 1.673139 | -2.57586 | -1.87916 |
| H | 1.179729 | -2.18908 | -1.11297 |
| O | -1.67314 | 2.575859 | -1.87916 |
| H | -1.17973 | 2.18908  | -1.11297 |
| C | 2.583813 | 0.795944 | 0.253511 |
| H | 2.503269 | -0.29382 | 0.183208 |
| H | 3.097678 | 1.143566 | -0.64952 |

|    |           |          |          |
|----|-----------|----------|----------|
| H  | 3.215968  | 1.047168 | 1.105708 |
| C  | -0.88924  | -2.26338 | 1.554815 |
| C  | -0.21269  | -3.78366 | 3.805889 |
| C  | -0.00927  | -3.35447 | 1.44912  |
| C  | -1.42367  | -1.95886 | 2.816167 |
| C  | -1.0839   | -2.70502 | 3.943509 |
| C  | 0.325969  | -4.11802 | 2.562446 |
| H  | 0.403486  | -3.61301 | 0.479545 |
| H  | -2.09245  | -1.11277 | 2.938589 |
| H  | -1.49004  | -2.45249 | 4.917074 |
| H  | 0.99473   | -4.96704 | 2.469427 |
| C  | 0.889241  | 2.263379 | 1.554815 |
| C  | 0.212685  | 3.783655 | 3.805889 |
| C  | 0.00927   | 3.354473 | 1.44912  |
| C  | 1.423666  | 1.95886  | 2.816167 |
| C  | 1.083898  | 2.705016 | 3.943509 |
| C  | -0.32597  | 4.118019 | 2.562446 |
| H  | -0.40349  | 3.613012 | 0.479545 |
| H  | 2.092445  | 1.11277  | 2.938589 |
| H  | 1.490038  | 2.452491 | 4.917074 |
| H  | -0.99473  | 4.967044 | 2.469427 |
| Cl | 0.212471  | -4.73964 | 5.217265 |
| Cl | -0.212471 | 4.739639 | 5.217265 |

Atom coordinates of **TS-b**

| Atom | X        | Y        | Z        |
|------|----------|----------|----------|
| N    | -0.77891 | -1.41597 | 0.595073 |
| C    | -1.99567 | 1.072644 | -0.95112 |
| C    | 0.354254 | 0.782778 | -1.01157 |
| N    | -0.77126 | 1.42326  | -0.60451 |
| C    | 0.344316 | -0.78201 | 1.020237 |
| C    | -2.00113 | -1.06721 | 0.950389 |
| H    | -2.1797  | 0.29293  | -1.69268 |
| H    | -2.17984 | -0.29572 | 1.702071 |
| C    | -3.16539 | -1.78749 | 0.484082 |
| C    | -5.46927 | -3.15038 | -0.37468 |
| C    | -3.07621 | -2.81637 | -0.4981  |

|   |          |          |          |
|---|----------|----------|----------|
| C | -4.4374  | -1.47172 | 1.008702 |
| C | -5.57889 | -2.14086 | 0.59201  |
| C | -4.23227 | -3.48429 | -0.91748 |
| H | -4.50845 | -0.68653 | 1.757197 |
| H | -6.54681 | -1.88416 | 1.011281 |
| H | -4.13166 | -4.26313 | -1.66687 |
| H | -6.3575  | -3.68149 | -0.7065  |
| C | -3.15851 | 1.799904 | -0.4918  |
| C | -5.46197 | 3.166674 | 0.363378 |
| C | -4.43234 | 1.475808 | -1.00723 |
| C | -3.06766 | 2.841569 | 0.47652  |
| C | -4.22304 | 3.510915 | 0.895084 |
| C | -5.5734  | 2.146488 | -0.59194 |
| H | -4.50554 | 0.682418 | -1.74675 |
| H | -4.1203  | 4.299264 | 1.634169 |
| H | -6.54271 | 1.882557 | -1.00346 |
| H | -6.35007 | 3.698708 | 0.694072 |
| C | 0.265899 | 0.276821 | 2.093059 |
| H | 1.178664 | 0.868961 | 2.159075 |
| H | 0.104017 | -0.19218 | 3.074827 |
| H | -0.55543 | 0.97426  | 1.916419 |
| O | -1.895   | -3.15605 | -1.05573 |
| H | -1.20004 | -2.61818 | -0.58395 |
| O | -1.883   | 3.192255 | 1.019461 |
| H | -1.1914  | 2.661413 | 0.535263 |
| C | 0.308248 | -0.29851 | -2.06551 |
| H | 1.150384 | -0.98693 | -1.97152 |
| H | 0.345828 | 0.143975 | -3.07127 |
| H | -0.59686 | -0.90261 | -1.99513 |
| C | 1.62372  | 1.492684 | -0.78038 |
| C | 4.058082 | 2.863953 | -0.36844 |
| C | 2.836554 | 1.030623 | -1.33632 |
| C | 1.684818 | 2.679566 | -0.01352 |
| C | 2.879818 | 3.354695 | 0.199083 |
| C | 4.039252 | 1.705898 | -1.14077 |
| H | 2.853574 | 0.133729 | -1.9435  |
| H | 0.779309 | 3.093412 | 0.410249 |
| H | 2.897397 | 4.264572 | 0.789927 |

|    |          |          |          |
|----|----------|----------|----------|
| H  | 4.955598 | 1.330345 | -1.58386 |
| C  | 1.613401 | -1.49432 | 0.793861 |
| C  | 4.037277 | -2.8811  | 0.375052 |
| C  | 1.643218 | -2.76193 | 0.166083 |
| C  | 2.853025 | -0.9572  | 1.204686 |
| C  | 4.050533 | -1.63861 | 1.003513 |
| C  | 2.83283  | -3.44769 | -0.04634 |
| H  | 0.715055 | -3.23368 | -0.13013 |
| H  | 2.898793 | 0.010169 | 1.688695 |
| H  | 4.988751 | -1.20315 | 1.330372 |
| H  | 2.825673 | -4.4224  | -0.5228  |
| Cl | 5.547002 | -3.74385 | 0.116843 |
| Cl | 5.572756 | 3.718236 | -0.11168 |

Atom coordinates of **6b**

| Atom | X        | Y        | Z        |
|------|----------|----------|----------|
| N    | -0.15794 | -1.37038 | -1.01532 |
| C    | 0.714157 | 2.499275 | -1.28424 |
| C    | 0.479534 | 0.649186 | 0.23375  |
| N    | 0.157937 | 1.370378 | -1.01532 |
| C    | -0.47953 | -0.64919 | 0.23375  |
| C    | -0.71416 | -2.49928 | -1.28424 |
| H    | 1.408058 | 2.985203 | -0.58479 |
| H    | -1.40806 | -2.9852  | -0.58479 |
| C    | -0.44744 | -3.22325 | -2.51715 |
| C    | 0.052192 | -4.67107 | -4.86086 |
| C    | 0.443953 | -2.7088  | -3.49926 |
| C    | -1.07299 | -4.46367 | -2.7461  |
| C    | -0.83355 | -5.18892 | -3.90334 |
| C    | 0.684312 | -3.44947 | -4.66667 |
| H    | -1.75444 | -4.8479  | -1.98967 |
| H    | -1.32331 | -6.14386 | -4.06655 |
| H    | 1.368064 | -3.03953 | -5.40321 |
| H    | 0.247946 | -5.23104 | -5.77184 |
| C    | 0.447439 | 3.223254 | -2.51715 |
| C    | -0.05219 | 4.671065 | -4.86086 |
| C    | 1.072993 | 4.463669 | -2.7461  |

|   |          |          |          |
|---|----------|----------|----------|
| C | -0.44395 | 2.708803 | -3.49926 |
| C | -0.68431 | 3.449465 | -4.66667 |
| C | 0.833554 | 5.188915 | -3.90334 |
| H | 1.754443 | 4.847901 | -1.98967 |
| H | -1.36806 | 3.03953  | -5.40321 |
| H | 1.323312 | 6.143863 | -4.06655 |
| H | -0.24795 | 5.231044 | -5.77184 |
| C | -1.9627  | -0.22101 | 0.148781 |
| H | -2.14148 | 0.315988 | -0.78471 |
| H | -2.26068 | 0.426321 | 0.975445 |
| H | -2.60548 | -1.10634 | 0.165222 |
| O | 1.069158 | -1.53103 | -3.34299 |
| H | 0.747955 | -1.14136 | -2.48179 |
| O | -1.06916 | 1.531029 | -3.34299 |
| H | -0.74796 | 1.141358 | -2.48179 |
| C | 1.962701 | 0.221014 | 0.148781 |
| H | 2.141479 | -0.31599 | -0.78471 |
| H | 2.260678 | -0.42632 | 0.975445 |
| H | 2.605479 | 1.106335 | 0.165222 |
| C | 0.229152 | 1.529567 | 1.475001 |
| C | -0.23449 | 3.139565 | 3.740089 |
| C | -0.73906 | 2.547994 | 1.464335 |
| C | 0.950138 | 1.343685 | 2.664375 |
| C | 0.730394 | 2.137647 | 3.790622 |
| C | -0.97654 | 3.349316 | 2.580264 |
| H | -1.31443 | 2.73771  | 0.565094 |
| H | 1.702624 | 0.567001 | 2.733474 |
| H | 1.305864 | 1.977532 | 4.696424 |
| H | -1.72594 | 4.133246 | 2.545438 |
| C | -0.22915 | -1.52957 | 1.475001 |
| C | 0.234485 | -3.13957 | 3.740089 |
| C | 0.739062 | -2.54799 | 1.464335 |
| C | -0.95014 | -1.34369 | 2.664375 |
| C | -0.73039 | -2.13765 | 3.790622 |
| C | 0.976542 | -3.34932 | 2.580264 |
| H | 1.314428 | -2.73771 | 0.565094 |
| H | -1.70262 | -0.567   | 2.733474 |
| H | -1.30586 | -1.97753 | 4.696424 |

|    |           |          |          |
|----|-----------|----------|----------|
| H  | 1.725944  | -4.13325 | 2.545438 |
| Cl | 0.516476  | -4.15465 | 5.149117 |
| Cl | -0.516476 | 4.15465  | 5.149117 |

---

---

Atom coordinates of **5c**

---

| Atom | X        | Y        | Z        |
|------|----------|----------|----------|
| N    | -0.31413 | -1.34868 | -0.42021 |
| C    | 0.503368 | 0.609365 | -1.66818 |
| C    | 1.229232 | 1.446506 | 0.472091 |
| N    | 0.314126 | 1.34868  | -0.42021 |
| C    | -1.22923 | -1.44651 | 0.472091 |
| C    | -0.50337 | -0.60937 | -1.66818 |
| H    | 1.509099 | 0.18894  | -1.76428 |
| H    | -1.5091  | -0.18894 | -1.76428 |
| C    | -0.23483 | -1.54173 | -2.84129 |
| C    | 0.307951 | -3.15637 | -5.07498 |
| C    | 0.853164 | -2.44324 | -2.82693 |
| C    | -1.04521 | -1.49155 | -3.98098 |
| C    | -0.78519 | -2.2875  | -5.0954  |
| C    | 1.120095 | -3.23842 | -3.94661 |
| H    | -1.88556 | -0.80156 | -3.99631 |
| H    | -1.42646 | -2.22657 | -5.96961 |
| H    | 1.964501 | -3.91955 | -3.90257 |
| H    | 0.524416 | -3.78215 | -5.9369  |
| C    | 0.234827 | 1.541732 | -2.84129 |
| C    | -0.30795 | 3.156366 | -5.07498 |
| C    | 1.045214 | 1.49155  | -3.98098 |
| C    | -0.85316 | 2.443238 | -2.82693 |
| C    | -1.1201  | 3.238422 | -3.94661 |
| C    | 0.785192 | 2.287502 | -5.0954  |
| H    | 1.885556 | 0.801563 | -3.99631 |
| H    | -1.9645  | 3.919548 | -3.90257 |
| H    | 1.426458 | 2.226574 | -5.96961 |
| H    | -0.52442 | 3.782154 | -5.9369  |
| C    | -2.60625 | -0.81473 | 0.36612  |
| H    | -3.24177 | -1.07506 | 1.21321  |
| H    | -3.10847 | -1.16686 | -0.54158 |

|   |          |          |          |
|---|----------|----------|----------|
| H | -2.53871 | 0.27624  | 0.298499 |
| O | 1.677802 | -2.56825 | -1.74449 |
| H | 1.186162 | -2.18388 | -0.97798 |
| O | -1.6778  | 2.568249 | -1.74449 |
| H | -1.18616 | 2.183883 | -0.97798 |
| C | 2.606251 | 0.814727 | 0.36612  |
| H | 2.538705 | -0.27624 | 0.298499 |
| H | 3.108474 | 1.166857 | -0.54158 |
| H | 3.241768 | 1.075061 | 1.21321  |
| C | -0.90082 | -2.25673 | 1.684233 |
| C | -0.21628 | -3.76509 | 3.957154 |
| C | -0.02464 | -3.35171 | 1.5807   |
| C | -1.43063 | -1.93502 | 2.944107 |
| C | -1.08776 | -2.67104 | 4.073538 |
| C | 0.311257 | -4.10353 | 2.698689 |
| H | 0.381577 | -3.61681 | 0.610385 |
| H | -2.09754 | -1.08638 | 3.05674  |
| H | -1.49041 | -2.40494 | 5.045399 |
| H | 0.977613 | -4.95515 | 2.607249 |
| C | 0.90082  | 2.25673  | 1.684233 |
| C | 0.216275 | 3.765093 | 3.957154 |
| C | 0.024636 | 3.351712 | 1.5807   |
| C | 1.43063  | 1.935017 | 2.944107 |
| C | 1.087755 | 2.671037 | 4.073538 |
| C | -0.31126 | 4.103525 | 2.698689 |
| H | -0.38158 | 3.616811 | 0.610385 |
| H | 2.097535 | 1.086377 | 3.05674  |
| H | 1.490412 | 2.40494  | 5.045399 |
| H | -0.97761 | 4.955145 | 2.607249 |
| C | 0.132551 | -4.53353 | 5.116161 |
| N | 0.416921 | -5.15453 | 6.057791 |
| C | -0.13255 | 4.533534 | 5.116161 |
| N | -0.41692 | 5.154526 | 6.057791 |

---

Atom coordinates of **TS-c**

---

| Atom | X        | Y        | Z        |
|------|----------|----------|----------|
| N    | -0.62954 | -1.41546 | 0.625111 |



|   |          |          |          |
|---|----------|----------|----------|
| C | -1.84013 | 1.063296 | -0.98755 |
| C | 0.50798  | 0.78607  | -1.03493 |
| N | -0.62085 | 1.419743 | -0.62708 |
| C | 0.498502 | -0.78694 | 1.044244 |
| C | -1.84773 | -1.05722 | 0.987027 |
| H | -2.01083 | 0.27575  | -1.72397 |
| H | -2.01599 | -0.27256 | 1.727278 |
| C | -3.01945 | -1.77061 | 0.536976 |
| C | -5.34027 | -3.12475 | -0.28487 |
| C | -2.94684 | -2.8118  | -0.43432 |
| C | -4.28502 | -1.43684 | 1.068837 |
| C | -5.43426 | -2.10156 | 0.670297 |
| C | -4.11185 | -3.47572 | -0.83521 |
| H | -4.34278 | -0.64211 | 1.808303 |
| H | -6.39671 | -1.8329  | 1.094304 |
| H | -4.0247  | -4.26497 | -1.57517 |
| H | -6.23557 | -3.65319 | -0.60129 |
| C | -3.0112  | 1.781655 | -0.54343 |
| C | -5.33244 | 3.138669 | 0.273376 |
| C | -4.27703 | 1.444679 | -1.07287 |
| C | -2.93874 | 2.829014 | 0.421081 |
| C | -4.10366 | 3.494128 | 0.819991 |
| C | -5.42635 | 2.110623 | -0.67661 |
| H | -4.33515 | 0.646192 | -1.80824 |
| H | -4.01613 | 4.288065 | 1.55488  |
| H | -6.38897 | 1.838997 | -1.09832 |
| H | -6.2279  | 3.667922 | 0.587986 |
| C | 0.429846 | 0.289294 | 2.099364 |
| H | 1.346805 | 0.875183 | 2.157321 |
| H | 0.261878 | -0.1612  | 3.088567 |
| H | -0.38593 | 0.990402 | 1.9102   |
| O | -1.77387 | -3.16618 | -0.99768 |
| H | -1.07049 | -2.63298 | -0.53484 |
| O | -1.76444 | 3.188545 | 0.9782   |
| H | -1.06242 | 2.660832 | 0.507506 |
| C | 0.458478 | -0.30494 | -2.07718 |
| H | 1.337272 | -0.94982 | -2.03434 |
| H | 0.410214 | 0.130544 | -3.0858  |

|   |          |          |          |
|---|----------|----------|----------|
| H | -0.41098 | -0.95169 | -1.9482  |
| C | 1.772739 | 1.491811 | -0.78758 |
| C | 4.214586 | 2.873457 | -0.33549 |
| C | 2.997606 | 1.021948 | -1.31566 |
| C | 1.81838  | 2.687615 | -0.02914 |
| C | 3.006809 | 3.360486 | 0.199844 |
| C | 4.1926   | 1.697278 | -1.10042 |
| H | 3.025155 | 0.120327 | -1.91472 |
| H | 0.90328  | 3.104785 | 0.368686 |
| H | 3.009212 | 4.276595 | 0.781878 |
| H | 5.115442 | 1.313928 | -1.52375 |
| C | 1.762548 | -1.49527 | 0.799493 |
| C | 4.196056 | -2.88803 | 0.339662 |
| C | 1.785882 | -2.74857 | 0.138807 |
| C | 3.005947 | -0.97114 | 1.223032 |
| C | 4.196999 | -1.65092 | 1.00246  |
| C | 2.970106 | -3.4292  | -0.09125 |
| H | 0.855222 | -3.20719 | -0.16781 |
| H | 3.053615 | -0.0176  | 1.733038 |
| H | 5.1354   | -1.22414 | 1.34176  |
| H | 2.955162 | -4.39167 | -0.59261 |
| C | 5.442865 | 3.571857 | -0.10773 |
| N | 6.440668 | 4.14055  | 0.081837 |
| C | 5.420752 | -3.59198 | 0.109402 |
| N | 6.415435 | -4.16553 | -0.08198 |

---

---

Atom coordinates of **6c**

---

| Atom | X        | Y        | Z        |
|------|----------|----------|----------|
| N    | -0.1502  | -1.37227 | -0.88358 |
| C    | 0.708837 | 2.499647 | -1.15814 |
| C    | 0.479073 | 0.65138  | 0.361643 |
| N    | 0.150204 | 1.372273 | -0.88358 |
| C    | -0.47907 | -0.65138 | 0.361643 |
| C    | -0.70884 | -2.49965 | -1.15814 |
| H    | 1.410541 | 2.983315 | -0.4648  |
| H    | -1.41054 | -2.98332 | -0.4648  |
| C    | -0.43673 | -3.22373 | -2.38833 |

|   |          |          |          |
|---|----------|----------|----------|
| C | 0.071757 | -4.67357 | -4.72834 |
| C | 0.460134 | -2.71125 | -3.36672 |
| C | -1.06398 | -4.46353 | -2.61961 |
| C | -0.81995 | -5.18946 | -3.7749  |
| C | 0.705019 | -3.45302 | -4.53232 |
| H | -1.7501  | -4.84618 | -1.86665 |
| H | -1.31047 | -6.14354 | -3.9402  |
| H | 1.392922 | -3.04502 | -5.26598 |
| H | 0.27108  | -5.2346  | -5.6378  |
| C | 0.436728 | 3.22373  | -2.38833 |
| C | -0.07176 | 4.67357  | -4.72834 |
| C | 1.06398  | 4.46353  | -2.61961 |
| C | -0.46013 | 2.711249 | -3.36672 |
| C | -0.70502 | 3.453024 | -4.53232 |
| C | 0.81995  | 5.189457 | -3.7749  |
| H | 1.750104 | 4.846182 | -1.86665 |
| H | -1.39292 | 3.045016 | -5.26598 |
| H | 1.310467 | 6.143543 | -3.9402  |
| H | -0.27108 | 5.234598 | -5.6378  |
| C | -1.96365 | -0.2282  | 0.275329 |
| H | -2.1426  | 0.305075 | -0.65996 |
| H | -2.26661 | 0.420331 | 1.099252 |
| H | -2.6037  | -1.11542 | 0.292982 |
| O | 1.086148 | -1.53391 | -3.20912 |
| H | 0.761875 | -1.14203 | -2.35124 |
| O | -1.08615 | 1.533906 | -3.20912 |
| H | -0.76188 | 1.142027 | -2.35124 |
| C | 1.963646 | 0.228202 | 0.275329 |
| H | 2.1426   | -0.30508 | -0.65996 |
| H | 2.266609 | -0.42033 | 1.099252 |
| H | 2.603697 | 1.115424 | 0.292982 |
| C | 0.225872 | 1.527015 | 1.605694 |
| C | -0.2459  | 3.136145 | 3.888137 |
| C | -0.74995 | 2.54005  | 1.596486 |
| C | 0.954104 | 1.34147  | 2.792174 |
| C | 0.730774 | 2.13002  | 3.91731  |
| C | -0.98909 | 3.333014 | 2.713978 |
| H | -1.3254  | 2.726279 | 0.696994 |

|   |          |          |          |
|---|----------|----------|----------|
| H | 1.713499 | 0.57133  | 2.853378 |
| H | 1.312044 | 1.969465 | 4.819729 |
| H | -1.7463  | 4.109945 | 2.680107 |
| C | -0.22587 | -1.52702 | 1.605694 |
| C | 0.2459   | -3.13615 | 3.888137 |
| C | 0.749945 | -2.54005 | 1.596486 |
| C | -0.9541  | -1.34147 | 2.792174 |
| C | -0.73077 | -2.13002 | 3.91731  |
| C | 0.98909  | -3.33301 | 2.713978 |
| H | 1.325401 | -2.72628 | 0.696994 |
| H | -1.7135  | -0.57133 | 2.853378 |
| H | -1.31204 | -1.96947 | 4.819729 |
| H | 1.746304 | -4.10995 | 2.680107 |
| C | -0.4815  | 3.953531 | 5.04211  |
| N | -0.67434 | 4.615134 | 5.979297 |
| C | 0.481503 | -3.95353 | 5.04211  |
| N | 0.674335 | -4.61513 | 5.979297 |

---

---

Atom coordinates of **5d**

---

| Atom | X        | Y        | Z        |
|------|----------|----------|----------|
| N    | -0.3316  | -1.34315 | -0.78916 |
| C    | 0.510742 | 0.602736 | -2.03818 |
| C    | 1.252784 | 1.438526 | 0.096773 |
| N    | 0.331603 | 1.343149 | -0.78916 |
| C    | -1.25278 | -1.43853 | 0.096773 |
| C    | -0.51074 | -0.60274 | -2.03818 |
| H    | 1.511287 | 0.170505 | -2.13552 |
| H    | -1.51129 | -0.17051 | -2.13552 |
| C    | -0.25217 | -1.54048 | -3.20922 |
| C    | 0.272006 | -3.16687 | -5.43841 |
| C    | 0.827435 | -2.4519  | -3.19364 |
| C    | -1.06405 | -1.48618 | -4.34775 |
| C    | -0.8131  | -2.28794 | -5.45997 |
| C    | 1.085257 | -3.25293 | -4.31113 |
| H    | -1.89818 | -0.78871 | -4.36386 |
| H    | -1.45514 | -2.22386 | -6.33336 |
| H    | 1.923246 | -3.94185 | -4.26616 |

|   |          |          |          |
|---|----------|----------|----------|
| H | 0.481214 | -3.79743 | -6.29861 |
| C | 0.252171 | 1.540481 | -3.20922 |
| C | -0.27201 | 3.166874 | -5.43841 |
| C | 1.06405  | 1.48618  | -4.34775 |
| C | -0.82744 | 2.451899 | -3.19364 |
| C | -1.08526 | 3.252929 | -4.31113 |
| C | 0.813098 | 2.287941 | -5.45997 |
| H | 1.898179 | 0.788709 | -4.36386 |
| H | -1.92325 | 3.941845 | -4.26616 |
| H | 1.455144 | 2.223858 | -6.33336 |
| H | -0.48121 | 3.797434 | -6.29861 |
| C | -2.62742 | -0.80315 | -0.01622 |
| H | -3.26978 | -1.06636 | 0.82479  |
| H | -3.12357 | -1.14857 | -0.92971 |
| H | -2.55617 | 0.288094 | -0.0769  |
| O | 1.652991 | -2.5814  | -2.11218 |
| H | 1.166378 | -2.19295 | -1.34523 |
| O | -1.65299 | 2.581395 | -2.11218 |
| H | -1.16638 | 2.192954 | -1.34523 |
| C | 2.627424 | 0.80315  | -0.01622 |
| H | 2.556165 | -0.28809 | -0.0769  |
| H | 3.123573 | 1.148571 | -0.92971 |
| H | 3.269779 | 1.066362 | 0.82479  |
| C | -0.93178 | -2.24904 | 1.311675 |
| C | -0.26889 | -3.73978 | 3.565295 |
| C | -0.05969 | -3.34827 | 1.210986 |
| C | -1.46601 | -1.92096 | 2.568807 |
| C | -1.132   | -2.65613 | 3.702456 |
| C | 0.271141 | -4.10039 | 2.331602 |
| H | 0.34795  | -3.61675 | 0.242407 |
| H | -2.12965 | -1.06937 | 2.676605 |
| H | -1.52577 | -2.40449 | 4.679459 |
| H | 0.932052 | -4.95598 | 2.266308 |
| C | 0.931784 | 2.249037 | 1.311675 |
| C | 0.268893 | 3.739778 | 3.565295 |
| C | 0.059692 | 3.34827  | 1.210986 |
| C | 1.46601  | 1.920964 | 2.568807 |
| C | 1.131996 | 2.656133 | 3.702456 |

|   |          |          |          |
|---|----------|----------|----------|
| C | -0.27114 | 4.100389 | 2.331602 |
| H | -0.34795 | 3.616748 | 0.242407 |
| H | 2.129647 | 1.069365 | 2.676605 |
| H | 1.525767 | 2.404492 | 4.679459 |
| H | -0.93205 | 4.955983 | 2.266308 |
| N | -0.08362 | 4.527371 | 4.758787 |
| O | 0.41707  | 4.191603 | 5.831411 |
| O | -0.85913 | 5.470715 | 4.610018 |
| N | 0.083622 | -4.52737 | 4.758787 |
| O | 0.859131 | -5.47072 | 4.610018 |
| O | -0.41707 | -4.1916  | 5.831411 |

---

---

Atom coordinates of **TS-d**

---

---

| Atom | X        | Y        | Z        |
|------|----------|----------|----------|
| N    | -1.01273 | -1.41124 | 0.612526 |
| C    | -2.22207 | 1.071428 | -1.00548 |
| C    | 0.121088 | 0.757896 | -1.00204 |
| N    | -1.01278 | 1.411245 | -0.61242 |
| C    | 0.121126 | -0.75779 | 1.002003 |
| C    | -2.22203 | -1.07167 | 1.005741 |
| H    | -2.38284 | 0.286207 | -1.74738 |
| H    | -2.38285 | -0.2866  | 1.747794 |
| C    | -3.40073 | -1.78274 | 0.56921  |
| C    | -5.73305 | -3.128   | -0.22847 |
| C    | -3.34083 | -2.82342 | -0.40288 |
| C    | -4.6591  | -1.44333 | 1.114026 |
| C    | -5.81446 | -2.1035  | 0.727121 |
| C    | -4.51232 | -3.48409 | -0.79145 |
| H    | -4.70603 | -0.64638 | 1.851957 |
| H    | -6.77199 | -1.83095 | 1.159531 |
| H    | -4.43581 | -4.27403 | -1.5318  |
| H    | -6.6335  | -3.65326 | -0.53544 |
| C    | -3.40083 | 1.782356 | -0.56887 |
| C    | -5.73322 | 3.127498 | 0.228797 |
| C    | -4.65923 | 1.44265  | -1.11343 |
| C    | -3.34094 | 2.823201 | 0.403053 |
| C    | -4.51247 | 3.483849 | 0.791559 |

|   |          |          |          |
|---|----------|----------|----------|
| C | -5.81463 | 2.10277  | -0.72655 |
| H | -4.70615 | 0.64544  | -1.85107 |
| H | -4.43596 | 4.274018 | 1.531659 |
| H | -6.77217 | 1.830004 | -1.15879 |
| H | -6.63371 | 3.65271  | 0.535744 |
| C | 0.05723  | 0.301794 | 2.076082 |
| H | 0.961667 | 0.908385 | 2.116083 |
| H | -0.07242 | -0.16731 | 3.062012 |
| H | -0.77773 | 0.987009 | 1.91846  |
| O | -2.17517 | -3.18095 | -0.97716 |
| H | -1.46641 | -2.64737 | -0.52347 |
| O | -2.17529 | 3.180887 | 0.977276 |
| H | -1.46649 | 2.647155 | 0.523835 |
| C | 0.056903 | -0.30138 | -2.07639 |
| H | 0.962048 | -0.90681 | -2.1183  |
| H | -0.07492 | 0.168066 | -3.06188 |
| H | -0.77703 | -0.98766 | -1.91778 |
| C | 1.383148 | 1.478313 | -0.76834 |
| C | 3.786675 | 2.870901 | -0.33517 |
| C | 2.619238 | 0.983903 | -1.24732 |
| C | 1.408947 | 2.70862  | -0.06507 |
| C | 2.590662 | 3.397105 | 0.157186 |
| C | 3.809579 | 1.670985 | -1.0407  |
| H | 2.661752 | 0.050461 | -1.79333 |
| H | 0.483717 | 3.142974 | 0.287905 |
| H | 2.600914 | 4.339803 | 0.690437 |
| H | 4.751619 | 1.288805 | -1.41447 |
| C | 1.38318  | -1.47819 | 0.768239 |
| C | 3.786817 | -2.87058 | 0.33496  |
| C | 1.409474 | -2.70694 | 0.062288 |
| C | 2.618814 | -0.98533 | 1.249972 |
| C | 3.809169 | -1.67251 | 1.04362  |
| C | 2.591302 | -3.39504 | -0.16048 |
| H | 0.484586 | -3.14033 | -0.2927  |
| H | 2.660866 | -0.05318 | 1.798238 |
| H | 4.750812 | -1.29161 | 1.419674 |
| H | 2.602006 | -4.33623 | -0.69643 |
| N | 5.03866  | 3.598634 | -0.11198 |

|   |          |          |          |
|---|----------|----------|----------|
| O | 6.073491 | 3.113817 | -0.57258 |
| O | 4.982105 | 4.651785 | 0.525385 |
| N | 5.0388   | -3.59828 | 0.111623 |
| O | 6.071759 | -3.12034 | 0.583855 |
| O | 4.984054 | -4.64451 | -0.53755 |

Atom coordinates of **6d**

| Atom | X        | Y        | Z        |
|------|----------|----------|----------|
| N    | -0.17508 | -1.36795 | -1.24222 |
| C    | 0.760067 | 2.480471 | -1.52363 |
| C    | 0.49178  | 0.642104 | 0.002491 |
| N    | 0.175084 | 1.367953 | -1.24222 |
| C    | -0.49178 | -0.6421  | 0.002491 |
| C    | -0.76007 | -2.48047 | -1.52363 |
| H    | 1.477798 | 2.949014 | -0.83634 |
| H    | -1.4778  | -2.94901 | -0.83634 |
| C    | -0.49804 | -3.20743 | -2.75401 |
| C    | -0.00976 | -4.66315 | -5.09467 |
| C    | 0.415761 | -2.71352 | -3.72639 |
| C    | -1.15258 | -4.43193 | -2.99189 |
| C    | -0.91852 | -5.16055 | -4.14741 |
| C    | 0.650146 | -3.4579  | -4.89234 |
| H    | -1.8517  | -4.80048 | -2.24385 |
| H    | -1.42965 | -6.10287 | -4.3177  |
| H    | 1.351379 | -3.06402 | -5.62108 |
| H    | 0.181755 | -5.22667 | -6.00425 |
| C    | 0.498042 | 3.207425 | -2.75401 |
| C    | 0.009761 | 4.663146 | -5.09467 |
| C    | 1.152582 | 4.431931 | -2.99189 |
| C    | -0.41576 | 2.713522 | -3.72639 |
| C    | -0.65015 | 3.457904 | -4.89234 |
| C    | 0.918515 | 5.160549 | -4.14741 |
| H    | 1.851697 | 4.800477 | -2.24385 |
| H    | -1.35138 | 3.064018 | -5.62108 |
| H    | 1.429651 | 6.102867 | -4.3177  |
| H    | -0.18176 | 5.226671 | -6.00425 |
| C    | -1.96801 | -0.18948 | -0.08329 |



|   |          |          |          |
|---|----------|----------|----------|
| H | -2.13575 | 0.346852 | -1.01882 |
| H | -2.25801 | 0.465624 | 0.740174 |
| H | -2.62589 | -1.06347 | -0.06482 |
| O | 1.067838 | -1.55113 | -3.56267 |
| H | 0.747772 | -1.15387 | -2.7061  |
| O | -1.06784 | 1.551127 | -3.56267 |
| H | -0.74777 | 1.153869 | -2.7061  |
| C | 1.968009 | 0.189475 | -0.08329 |
| H | 2.135749 | -0.34685 | -1.01882 |
| H | 2.25801  | -0.46562 | 0.740174 |
| H | 2.625891 | 1.063468 | -0.06482 |
| C | 0.25653  | 1.523523 | 1.246126 |
| C | -0.16971 | 3.132437 | 3.499778 |
| C | -0.6948  | 2.560825 | 1.232172 |
| C | 0.97953  | 1.319228 | 2.433884 |
| C | 0.777633 | 2.115334 | 3.558487 |
| C | -0.91458 | 3.364388 | 2.346935 |
| H | -1.26491 | 2.758126 | 0.331941 |
| H | 1.717745 | 0.529169 | 2.496608 |
| H | 1.341484 | 1.958514 | 4.47001  |
| H | -1.64464 | 4.164571 | 2.332478 |
| C | -0.25653 | -1.52352 | 1.246126 |
| C | 0.169711 | -3.13244 | 3.499778 |
| C | 0.6948   | -2.56083 | 1.232172 |
| C | -0.97953 | -1.31923 | 2.433884 |
| C | -0.77763 | -2.11533 | 3.558487 |
| C | 0.914578 | -3.36439 | 2.346935 |
| H | 1.264914 | -2.75813 | 0.331941 |
| H | -1.71775 | -0.52917 | 2.496608 |
| H | -1.34148 | -1.95851 | 4.47001  |
| H | 1.644643 | -4.16457 | 2.332478 |
| N | -0.38919 | 3.980967 | 4.681309 |
| O | 0.287386 | 3.750348 | 5.683025 |
| O | -1.23729 | 4.86887  | 4.59597  |
| N | 0.389187 | -3.98097 | 4.681309 |
| O | 1.237293 | -4.86887 | 4.59597  |
| O | -0.28739 | -3.75035 | 5.683025 |

---

| Atom coordinates of 7* |          |          |          |
|------------------------|----------|----------|----------|
| Atom                   | X        | Y        | Z        |
| N                      | -0.50548 | -1.27888 | -1.50608 |
| C                      | 1.470752 | 1.241299 | -2.34271 |
| C                      | 0.551784 | 0.567221 | -0.2268  |
| N                      | 0.505483 | 1.278877 | -1.50608 |
| C                      | -0.55178 | -0.56722 | -0.2268  |
| C                      | -1.47075 | -1.2413  | -2.34271 |
| H                      | 1.516751 | 0.081962 | -0.05318 |
| H                      | -1.51675 | -0.08196 | -0.05318 |
| C                      | -2.77351 | -0.48099 | -2.16613 |
| H                      | -2.62061 | 0.524734 | -1.76471 |
| H                      | -3.43253 | -1.01633 | -1.47012 |
| H                      | -3.30156 | -0.39796 | -3.1201  |
| C                      | 2.77351  | 0.480985 | -2.16613 |
| H                      | 2.620608 | -0.52473 | -1.76471 |
| H                      | 3.432532 | 1.016334 | -1.47012 |
| H                      | 3.301556 | 0.397964 | -3.1201  |
| C                      | 0.286788 | 1.556457 | 0.898906 |
| C                      | -0.29446 | 3.279511 | 3.039777 |
| C                      | 1.021667 | 1.500874 | 2.087322 |
| C                      | -0.74201 | 2.519022 | 0.785488 |
| C                      | -1.02979 | 3.367852 | 1.859669 |
| C                      | 0.741806 | 2.350974 | 3.157181 |
| H                      | 1.816934 | 0.764679 | 2.177032 |
| H                      | -1.82664 | 4.095663 | 1.739773 |
| H                      | 1.323804 | 2.285041 | 4.071819 |
| H                      | -0.52523 | 3.947445 | 3.865804 |
| C                      | -0.28679 | -1.55646 | 0.898906 |
| C                      | 0.294459 | -3.27951 | 3.039777 |
| C                      | -1.02167 | -1.50087 | 2.087322 |
| C                      | 0.74201  | -2.51902 | 0.785488 |
| C                      | 1.029793 | -3.36785 | 1.859669 |
| C                      | -0.74181 | -2.35097 | 3.157181 |
| H                      | -1.81693 | -0.76468 | 2.177032 |
| H                      | 1.826641 | -4.09566 | 1.739773 |
| H                      | -1.3238  | -2.28504 | 4.071819 |

|   |          |          |          |
|---|----------|----------|----------|
| H | 0.525231 | -3.94745 | 3.865804 |
| O | -1.48497 | 2.646391 | -0.353   |
| H | -0.93232 | 2.262641 | -1.08262 |
| O | 1.484965 | -2.64639 | -0.353   |
| H | 0.932316 | -2.26264 | -1.08262 |
| C | 1.339302 | 2.035688 | -3.61813 |
| H | 1.39107  | 1.371    | -4.49051 |
| H | 2.171847 | 2.745088 | -3.71416 |
| H | 0.395933 | 2.585534 | -3.63993 |
| C | -1.3393  | -2.03569 | -3.61813 |
| H | -2.17185 | -2.74509 | -3.71416 |
| H | -0.39593 | -2.58553 | -3.63993 |
| H | -1.39107 | -1.371   | -4.49051 |

\*Calculation was performed using *(S,S)*-*hpen*.

Atom coordinates of **8**\*

| Atom | X        | Y        | Z        |
|------|----------|----------|----------|
| N    | -0.70081 | -1.29009 | -1.44072 |
| C    | 1.08517  | 0.677193 | -2.5515  |
| C    | 0.906887 | 0.800369 | -0.20441 |
| N    | 0.700811 | 1.290092 | -1.44072 |
| C    | -0.90689 | -0.80037 | -0.20441 |
| C    | -1.08517 | -0.67719 | -2.5515  |
| H    | 1.607742 | -0.01802 | -0.03783 |
| H    | -1.60774 | 0.018016 | -0.03783 |
| C    | -2.0801  | 0.461633 | -2.57605 |
| H    | -2.08051 | 0.951918 | -3.55397 |
| H    | -1.88699 | 1.218571 | -1.81342 |
| H    | -3.09406 | 0.066797 | -2.40912 |
| C    | 2.080102 | -0.46163 | -2.57605 |
| H    | 2.080505 | -0.95192 | -3.55397 |
| H    | 1.886992 | -1.21857 | -1.81342 |
| H    | 3.094055 | -0.0668  | -2.40912 |
| C    | 0.579084 | 1.611113 | 0.958855 |
| C    | -0.05955 | 3.097405 | 3.260306 |
| C    | 1.057617 | 1.231654 | 2.228722 |
| C    | -0.236   | 2.774919 | 0.865867 |
| C    | -0.54999 | 3.499732 | 2.020491 |

|   |          |          |          |
|---|----------|----------|----------|
| C | 0.752453 | 1.962975 | 3.37061  |
| H | 1.677253 | 0.34164  | 2.301557 |
| H | -1.17265 | 4.38303  | 1.916273 |
| H | 1.136624 | 1.650762 | 4.337029 |
| H | -0.30727 | 3.677585 | 4.145528 |
| C | -0.57908 | -1.61111 | 0.958855 |
| C | 0.059545 | -3.09741 | 3.260306 |
| C | -1.05762 | -1.23165 | 2.228722 |
| C | 0.236003 | -2.77492 | 0.865867 |
| C | 0.549987 | -3.49973 | 2.020491 |
| C | -0.75245 | -1.96298 | 3.37061  |
| H | -1.67725 | -0.34164 | 2.301557 |
| H | 1.172651 | -4.38303 | 1.916273 |
| H | -1.13662 | -1.65076 | 4.337029 |
| H | 0.307269 | -3.67759 | 4.145528 |
| O | -0.72994 | 3.205509 | -0.31813 |
| H | -0.27925 | 2.662089 | -1.023   |
| O | 0.729939 | -3.20551 | -0.31813 |
| H | 0.279253 | -2.66209 | -1.023   |
| C | 0.930516 | 1.460986 | -3.83038 |
| H | 0.717831 | 0.814351 | -4.68871 |
| H | 1.870768 | 1.984527 | -4.06172 |
| H | 0.145122 | 2.214809 | -3.73762 |
| C | -0.93052 | -1.46099 | -3.83038 |
| H | -1.87077 | -1.98453 | -4.06172 |
| H | -0.14512 | -2.21481 | -3.73762 |
| H | -0.71783 | -0.81435 | -4.68871 |

---

\*Calculation was performed using *(S,S)*-*hpen*.

---

Atom coordinates of **9**\*

| Atom | X        | Y        | Z        |
|------|----------|----------|----------|
| N    | 1.427965 | -0.22249 | -1.33761 |
| C    | -0.60199 | 0.530116 | -2.51561 |
| C    | -1.42284 | 0.946618 | -0.27489 |
| N    | -1.42797 | 0.222485 | -1.33761 |
| C    | 1.422841 | -0.94662 | -0.27489 |
| C    | 0.601988 | -0.53012 | -2.51561 |
| H    | -0.81534 | 1.853899 | -0.1897  |

|   |          |          |          |
|---|----------|----------|----------|
| H | 0.81534  | -1.8539  | -0.1897  |
| C | 0.071299 | -1.97772 | -2.54022 |
| H | -0.39316 | -2.19726 | -3.50524 |
| H | -0.67103 | -2.17027 | -1.76199 |
| H | 0.901752 | -2.6812  | -2.41224 |
| C | -0.0713  | 1.977722 | -2.54022 |
| H | 0.393158 | 2.197259 | -3.50524 |
| H | 0.671034 | 2.170267 | -1.76199 |
| H | -0.90175 | 2.681204 | -2.41224 |
| C | -2.22477 | 0.609743 | 0.894508 |
| C | -3.73003 | -0.00668 | 3.173969 |
| C | -2.18126 | 1.435755 | 2.032798 |
| C | -3.04787 | -0.54941 | 0.915709 |
| C | -3.79532 | -0.84321 | 2.065927 |
| C | -2.92305 | 1.140484 | 3.16739  |
| H | -1.5454  | 2.318421 | 2.00929  |
| H | -4.41767 | -1.73252 | 2.06112  |
| H | -2.87802 | 1.786909 | 4.038336 |
| H | -4.3159  | -0.24857 | 4.057142 |
| C | 2.224766 | -0.60974 | 0.894508 |
| C | 3.730028 | 0.006679 | 3.173969 |
| C | 2.18126  | -1.43576 | 2.032798 |
| C | 3.047874 | 0.549406 | 0.915709 |
| C | 3.795324 | 0.84321  | 2.065927 |
| C | 2.923051 | -1.14048 | 3.16739  |
| H | 1.545401 | -2.31842 | 2.00929  |
| H | 4.417671 | 1.732516 | 2.06112  |
| H | 2.87802  | -1.78691 | 4.038336 |
| H | 4.315901 | 0.248566 | 4.057142 |
| O | -3.12997 | -1.37779 | -0.13988 |
| H | -2.55613 | -0.97945 | -0.85914 |
| O | 3.129974 | 1.377791 | -0.13988 |
| H | 2.55613  | 0.979454 | -0.85914 |
| C | -1.53402 | 0.336421 | -3.7302  |
| H | -1.00238 | 0.475084 | -4.67635 |
| H | -2.33624 | 1.081064 | -3.68675 |
| H | -2.00279 | -0.65071 | -3.72841 |
| C | 1.53402  | -0.33642 | -3.7302  |

|   |          |          |          |
|---|----------|----------|----------|
| H | 2.336243 | -1.08106 | -3.68675 |
| H | 2.00279  | 0.65071  | -3.72841 |
| H | 1.002381 | -0.47508 | -4.67635 |

---

\*Calculation was performed using *(S,S)*-*hpen*

### Crystal structure and data

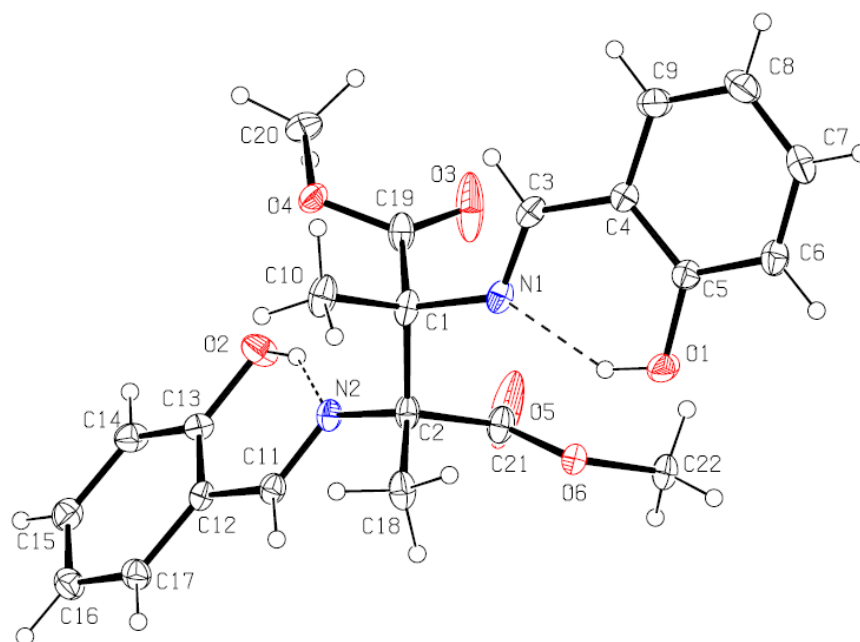

Figure S1. Crystal structure of diimine 3

Table S1. Crystal data and structure refinement for d12336.

|                                 |                                                               |                 |
|---------------------------------|---------------------------------------------------------------|-----------------|
| Identification code             | d12336                                                        |                 |
| Empirical formula               | C <sub>22</sub> H <sub>24</sub> N <sub>2</sub> O <sub>6</sub> |                 |
| Formula weight                  | 412.43                                                        |                 |
| Temperature                     | 147(2) K                                                      |                 |
| Wavelength                      | 1.54178 Å                                                     |                 |
| Crystal system                  | Monoclinic                                                    |                 |
| Space group                     | P 21                                                          |                 |
| Unit cell dimensions            | a = 6.9679(3) Å                                               | a = 90°.        |
|                                 | b = 19.0540(9) Å                                              | b = 93.428(2)°. |
|                                 | c = 7.6683(4) Å                                               | g = 90°.        |
| Volume                          | 1016.27(8) Å <sup>3</sup>                                     |                 |
| Z                               | 2                                                             |                 |
| Density (calculated)            | 1.348 Mg/m <sup>3</sup>                                       |                 |
| Absorption coefficient          | 0.819 mm <sup>-1</sup>                                        |                 |
| F(000)                          | 436                                                           |                 |
| Crystal size                    | 0.28 x 0.15 x 0.12 mm <sup>3</sup>                            |                 |
| Theta range for data collection | 4.64 to 66.31°.                                               |                 |

|                                   |                                             |
|-----------------------------------|---------------------------------------------|
| Index ranges                      | -8<=h<=7, -22<=k<=21, -9<=l<=9              |
| Reflections collected             | 12698                                       |
| Independent reflections           | 3412 [R(int) = 0.0305]                      |
| Completeness to theta = 66.31°    | 97.8 %                                      |
| Absorption correction             | Semi-empirical from equivalents             |
| Max. and min. transmission        | 0.7528 and 0.6930                           |
| Refinement method                 | Full-matrix least-squares on F <sup>2</sup> |
| Data / restraints / parameters    | 3412 / 1 / 283                              |
| Goodness-of-fit on F <sup>2</sup> | 1.067                                       |
| Final R indices [I>2sigma(I)]     | R1 = 0.0305, wR2 = 0.0761                   |
| R indices (all data)              | R1 = 0.0306, wR2 = 0.0763                   |
| Absolute structure parameter      | 0.16(14)                                    |
| Largest diff. peak and hole       | 0.175 and -0.217 e.Å <sup>-3</sup>          |



**Table S2. Atomic coordinates ( $\times 10^4$ ) and equivalent isotropic displacement parameters ( $\text{\AA}^2 \times 10^3$ ) for d12336. U(eq) is defined as one third of the trace of the orthogonalized  $U^{ij}$  tensor.**

|       | x        | y       | z        | U(eq) |
|-------|----------|---------|----------|-------|
| O(1)  | 4456(2)  | 3221(1) | 5202(2)  | 38(1) |
| O(2)  | 6771(2)  | 6630(1) | 10659(2) | 37(1) |
| O(3)  | 3030(3)  | 5554(1) | 7322(3)  | 78(1) |
| O(4)  | 4970(2)  | 6389(1) | 6500(2)  | 31(1) |
| O(5)  | 5173(3)  | 4783(1) | 10189(3) | 90(1) |
| O(6)  | 5861(2)  | 3857(1) | 8609(1)  | 26(1) |
| N(1)  | 5003(2)  | 4582(1) | 5374(2)  | 27(1) |
| N(2)  | 7816(2)  | 5568(1) | 8809(2)  | 26(1) |
| C(1)  | 5994(3)  | 5204(1) | 6119(2)  | 29(1) |
| C(2)  | 7246(2)  | 4944(1) | 7780(2)  | 27(1) |
| C(3)  | 3520(2)  | 4655(1) | 4325(2)  | 29(1) |
| C(4)  | 2443(2)  | 4058(1) | 3611(2)  | 26(1) |
| C(5)  | 2954(2)  | 3367(1) | 4058(2)  | 27(1) |
| C(6)  | 1909(3)  | 2804(1) | 3314(2)  | 34(1) |
| C(7)  | 364(2)   | 2932(1) | 2158(2)  | 36(1) |
| C(8)  | -206(3)  | 3611(1) | 1750(2)  | 43(1) |
| C(9)  | 831(3)   | 4167(1) | 2467(2)  | 37(1) |
| C(10) | 7250(3)  | 5531(1) | 4761(2)  | 38(1) |
| C(11) | 9532(2)  | 5640(1) | 9476(2)  | 26(1) |
| C(12) | 10041(2) | 6224(1) | 10648(2) | 24(1) |
| C(13) | 8639(2)  | 6690(1) | 11209(2) | 27(1) |
| C(14) | 9173(3)  | 7231(1) | 12369(2) | 32(1) |
| C(15) | 11075(3) | 7311(1) | 12937(2) | 33(1) |
| C(16) | 12483(2) | 6854(1) | 12409(2) | 33(1) |
| C(17) | 11965(2) | 6313(1) | 11279(2) | 30(1) |
| C(18) | 8899(2)  | 4481(1) | 7228(2)  | 34(1) |
| C(19) | 4482(3)  | 5728(1) | 6719(2)  | 32(1) |
| C(20) | 3600(3)  | 6904(1) | 7062(2)  | 36(1) |
| C(21) | 5945(2)  | 4536(1) | 8996(2)  | 32(1) |
| C(22) | 4659(2)  | 3434(1) | 9666(2)  | 34(1) |

**Table S3. Bond lengths [Å] and angles [°] for d12336.**

---

|              |            |
|--------------|------------|
| O(1)-C(5)    | 1.354(2)   |
| O(1)-H(10)   | 0.86(4)    |
| O(2)-C(13)   | 1.349(2)   |
| O(2)-H(20)   | 0.86(3)    |
| O(3)-C(19)   | 1.184(2)   |
| O(4)-C(19)   | 1.318(2)   |
| O(4)-C(20)   | 1.453(2)   |
| O(5)-C(21)   | 1.186(2)   |
| O(6)-C(21)   | 1.327(2)   |
| O(6)-C(22)   | 1.4450(19) |
| N(1)-C(3)    | 1.278(2)   |
| N(1)-C(1)    | 1.470(2)   |
| N(2)-C(11)   | 1.280(2)   |
| N(2)-C(2)    | 1.467(2)   |
| C(1)-C(10)   | 1.533(2)   |
| C(1)-C(19)   | 1.542(2)   |
| C(1)-C(2)    | 1.579(2)   |
| C(2)-C(18)   | 1.532(2)   |
| C(2)-C(21)   | 1.549(2)   |
| C(3)-C(4)    | 1.453(2)   |
| C(3)-H(3A)   | 0.9500     |
| C(4)-C(9)    | 1.399(2)   |
| C(4)-C(5)    | 1.401(2)   |
| C(5)-C(6)    | 1.398(2)   |
| C(6)-C(7)    | 1.375(3)   |
| C(6)-H(6A)   | 0.9500     |
| C(7)-C(8)    | 1.384(3)   |
| C(7)-H(7A)   | 0.9500     |
| C(8)-C(9)    | 1.379(3)   |
| C(8)-H(8A)   | 0.9500     |
| C(9)-H(9A)   | 0.9500     |
| C(10)-H(10A) | 0.9800     |
| C(10)-H(10B) | 0.9800     |
| C(10)-H(10C) | 0.9800     |

|                  |            |
|------------------|------------|
| C(11)-C(12)      | 1.461(2)   |
| C(11)-H(11A)     | 0.9500     |
| C(12)-C(13)      | 1.407(2)   |
| C(12)-C(17)      | 1.408(2)   |
| C(13)-C(14)      | 1.398(2)   |
| C(14)-C(15)      | 1.379(2)   |
| C(14)-H(14A)     | 0.9500     |
| C(15)-C(16)      | 1.389(3)   |
| C(15)-H(15A)     | 0.9500     |
| C(16)-C(17)      | 1.382(2)   |
| C(16)-H(16A)     | 0.9500     |
| C(17)-H(17A)     | 0.9500     |
| C(18)-H(18A)     | 0.9800     |
| C(18)-H(18B)     | 0.9800     |
| C(18)-H(18C)     | 0.9800     |
| C(20)-H(20A)     | 0.9800     |
| C(20)-H(20B)     | 0.9800     |
| C(20)-H(20C)     | 0.9800     |
| C(22)-H(22A)     | 0.9800     |
| C(22)-H(22B)     | 0.9800     |
| C(22)-H(22C)     | 0.9800     |
|                  |            |
| C(5)-O(1)-H(10)  | 109(2)     |
| C(13)-O(2)-H(20) | 106.0(15)  |
| C(19)-O(4)-C(20) | 115.38(13) |
| C(21)-O(6)-C(22) | 115.92(12) |
| C(3)-N(1)-C(1)   | 119.96(14) |
| C(11)-N(2)-C(2)  | 121.19(14) |
| N(1)-C(1)-C(10)  | 109.79(13) |
| N(1)-C(1)-C(19)  | 108.96(13) |
| C(10)-C(1)-C(19) | 111.52(14) |
| N(1)-C(1)-C(2)   | 106.61(12) |
| C(10)-C(1)-C(2)  | 111.38(14) |
| C(19)-C(1)-C(2)  | 108.43(12) |
| N(2)-C(2)-C(18)  | 115.59(13) |
| N(2)-C(2)-C(21)  | 103.43(12) |

|                     |            |
|---------------------|------------|
| C(18)-C(2)-C(21)    | 110.69(13) |
| N(2)-C(2)-C(1)      | 107.43(12) |
| C(18)-C(2)-C(1)     | 110.23(13) |
| C(21)-C(2)-C(1)     | 109.13(13) |
| N(1)-C(3)-C(4)      | 122.07(14) |
| N(1)-C(3)-H(3A)     | 119.0      |
| C(4)-C(3)-H(3A)     | 119.0      |
| C(9)-C(4)-C(5)      | 118.44(15) |
| C(9)-C(4)-C(3)      | 119.79(15) |
| C(5)-C(4)-C(3)      | 121.76(14) |
| O(1)-C(5)-C(6)      | 118.04(15) |
| O(1)-C(5)-C(4)      | 121.78(14) |
| C(6)-C(5)-C(4)      | 120.18(14) |
| C(7)-C(6)-C(5)      | 119.70(17) |
| C(7)-C(6)-H(6A)     | 120.1      |
| C(5)-C(6)-H(6A)     | 120.1      |
| C(6)-C(7)-C(8)      | 120.97(17) |
| C(6)-C(7)-H(7A)     | 119.5      |
| C(8)-C(7)-H(7A)     | 119.5      |
| C(9)-C(8)-C(7)      | 119.50(16) |
| C(9)-C(8)-H(8A)     | 120.3      |
| C(7)-C(8)-H(8A)     | 120.3      |
| C(8)-C(9)-C(4)      | 121.14(17) |
| C(8)-C(9)-H(9A)     | 119.4      |
| C(4)-C(9)-H(9A)     | 119.4      |
| C(1)-C(10)-H(10A)   | 109.5      |
| C(1)-C(10)-H(10B)   | 109.5      |
| H(10A)-C(10)-H(10B) | 109.5      |
| C(1)-C(10)-H(10C)   | 109.5      |
| H(10A)-C(10)-H(10C) | 109.5      |
| H(10B)-C(10)-H(10C) | 109.5      |
| N(2)-C(11)-C(12)    | 120.94(14) |
| N(2)-C(11)-H(11A)   | 119.5      |
| C(12)-C(11)-H(11A)  | 119.5      |
| C(13)-C(12)-C(17)   | 118.91(14) |
| C(13)-C(12)-C(11)   | 121.44(14) |

|                     |            |
|---------------------|------------|
| C(17)-C(12)-C(11)   | 119.63(14) |
| O(2)-C(13)-C(14)    | 118.44(14) |
| O(2)-C(13)-C(12)    | 121.74(14) |
| C(14)-C(13)-C(12)   | 119.82(14) |
| C(15)-C(14)-C(13)   | 119.74(15) |
| C(15)-C(14)-H(14A)  | 120.1      |
| C(13)-C(14)-H(14A)  | 120.1      |
| C(14)-C(15)-C(16)   | 121.45(16) |
| C(14)-C(15)-H(15A)  | 119.3      |
| C(16)-C(15)-H(15A)  | 119.3      |
| C(17)-C(16)-C(15)   | 119.20(16) |
| C(17)-C(16)-H(16A)  | 120.4      |
| C(15)-C(16)-H(16A)  | 120.4      |
| C(16)-C(17)-C(12)   | 120.88(16) |
| C(16)-C(17)-H(17A)  | 119.6      |
| C(12)-C(17)-H(17A)  | 119.6      |
| C(2)-C(18)-H(18A)   | 109.5      |
| C(2)-C(18)-H(18B)   | 109.5      |
| H(18A)-C(18)-H(18B) | 109.5      |
| C(2)-C(18)-H(18C)   | 109.5      |
| H(18A)-C(18)-H(18C) | 109.5      |
| H(18B)-C(18)-H(18C) | 109.5      |
| O(3)-C(19)-O(4)     | 123.32(17) |
| O(3)-C(19)-C(1)     | 123.42(16) |
| O(4)-C(19)-C(1)     | 113.26(13) |
| O(4)-C(20)-H(20A)   | 109.5      |
| O(4)-C(20)-H(20B)   | 109.5      |
| H(20A)-C(20)-H(20B) | 109.5      |
| O(4)-C(20)-H(20C)   | 109.5      |
| H(20A)-C(20)-H(20C) | 109.5      |
| H(20B)-C(20)-H(20C) | 109.5      |
| O(5)-C(21)-O(6)     | 122.90(16) |
| O(5)-C(21)-C(2)     | 125.02(15) |
| O(6)-C(21)-C(2)     | 112.00(13) |
| O(6)-C(22)-H(22A)   | 109.5      |
| O(6)-C(22)-H(22B)   | 109.5      |

|                     |       |
|---------------------|-------|
| H(22A)-C(22)-H(22B) | 109.5 |
| O(6)-C(22)-H(22C)   | 109.5 |
| H(22A)-C(22)-H(22C) | 109.5 |
| H(22B)-C(22)-H(22C) | 109.5 |

---

Symmetry transformations used to generate equivalent atoms:

**Table S4. Anisotropic displacement parameters ( $\text{\AA}^2 \times 10^3$ ) for d12336. The anisotropic displacement factor exponent takes the form:  $-2p^2[ h^2 a^{*2}U^{11} + \dots + 2 h k a^* b^* U^{12} ]$**

|       | U <sup>11</sup> | U <sup>22</sup> | U <sup>33</sup> | U <sup>23</sup> | U <sup>13</sup> | U <sup>12</sup> |
|-------|-----------------|-----------------|-----------------|-----------------|-----------------|-----------------|
| O(1)  | 46(1)           | 23(1)           | 43(1)           | 0(1)            | -17(1)          | -1(1)           |
| O(2)  | 29(1)           | 38(1)           | 43(1)           | -15(1)          | -3(1)           | 5(1)            |
| O(3)  | 74(1)           | 42(1)           | 128(2)          | -39(1)          | 76(1)           | -28(1)          |
| O(4)  | 30(1)           | 22(1)           | 40(1)           | 5(1)            | 6(1)            | 3(1)            |
| O(5)  | 147(2)          | 37(1)           | 97(1)           | -25(1)          | 98(1)           | -31(1)          |
| O(6)  | 29(1)           | 22(1)           | 28(1)           | 1(1)            | 4(1)            | -4(1)           |
| N(1)  | 38(1)           | 21(1)           | 22(1)           | -2(1)           | 6(1)            | -4(1)           |
| N(2)  | 30(1)           | 22(1)           | 27(1)           | -3(1)           | 5(1)            | -4(1)           |
| C(1)  | 38(1)           | 22(1)           | 27(1)           | -3(1)           | 10(1)           | -8(1)           |
| C(2)  | 31(1)           | 22(1)           | 30(1)           | -6(1)           | 10(1)           | -6(1)           |
| C(3)  | 37(1)           | 22(1)           | 29(1)           | 2(1)            | 7(1)            | 2(1)            |
| C(4)  | 30(1)           | 25(1)           | 22(1)           | -1(1)           | 4(1)            | 0(1)            |
| C(5)  | 31(1)           | 27(1)           | 24(1)           | 0(1)            | 1(1)            | -1(1)           |
| C(6)  | 40(1)           | 28(1)           | 32(1)           | -3(1)           | 3(1)            | -8(1)           |
| C(7)  | 33(1)           | 46(1)           | 30(1)           | -5(1)           | 4(1)            | -14(1)          |
| C(8)  | 30(1)           | 59(1)           | 39(1)           | 4(1)            | -5(1)           | -5(1)           |
| C(9)  | 34(1)           | 39(1)           | 37(1)           | 5(1)            | -1(1)           | 5(1)            |
| C(10) | 49(1)           | 30(1)           | 37(1)           | -2(1)           | 20(1)           | -8(1)           |
| C(11) | 28(1)           | 24(1)           | 27(1)           | 0(1)            | 8(1)            | -1(1)           |
| C(12) | 28(1)           | 21(1)           | 25(1)           | 2(1)            | 5(1)            | -3(1)           |
| C(13) | 28(1)           | 27(1)           | 27(1)           | 2(1)            | 0(1)            | 3(1)            |
| C(14) | 37(1)           | 29(1)           | 30(1)           | -4(1)           | -3(1)           | 6(1)            |
| C(15) | 42(1)           | 28(1)           | 28(1)           | -2(1)           | -4(1)           | -3(1)           |
| C(16) | 30(1)           | 39(1)           | 29(1)           | 1(1)            | -2(1)           | -6(1)           |
| C(17) | 26(1)           | 34(1)           | 30(1)           | 2(1)            | 6(1)            | -1(1)           |
| C(18) | 33(1)           | 28(1)           | 41(1)           | -11(1)          | 15(1)           | -7(1)           |
| C(19) | 39(1)           | 27(1)           | 30(1)           | -8(1)           | 10(1)           | -10(1)          |
| C(20) | 39(1)           | 32(1)           | 38(1)           | 2(1)            | 4(1)            | 11(1)           |
| C(21) | 38(1)           | 25(1)           | 32(1)           | -5(1)           | 12(1)           | -5(1)           |
| C(22) | 35(1)           | 29(1)           | 37(1)           | 5(1)            | 8(1)            | -8(1)           |

**Table S5. Hydrogen coordinates (  $\times 10^4$ ) and isotropic displacement parameters ( $\text{\AA}^2 \times 10^{-3}$ )  
for d12336.**

|        | x        | y        | z         | U(eq)   |
|--------|----------|----------|-----------|---------|
| H(3A)  | 3110     | 5115     | 4003      | 35      |
| H(6A)  | 2265     | 2335     | 3607      | 40      |
| H(7A)  | -322     | 2548     | 1631      | 44      |
| H(8A)  | -1303    | 3693     | 981       | 51      |
| H(9A)  | 443      | 4633     | 2180      | 44      |
| H(10A) | 6428     | 5754     | 3838      | 57      |
| H(10B) | 8029     | 5165     | 4251      | 57      |
| H(10C) | 8098     | 5885     | 5327      | 57      |
| H(11A) | 10489    | 5308     | 9206      | 31      |
| H(14A) | 8228     | 7543     | 12765     | 39      |
| H(15A) | 11431    | 7686     | 13706     | 40      |
| H(16A) | 13786    | 6914     | 12820     | 40      |
| H(17A) | 12919    | 5996     | 10923     | 36      |
| H(18A) | 9485     | 4239     | 8254      | 50      |
| H(18B) | 9868     | 4773     | 6703      | 50      |
| H(18C) | 8403     | 4133     | 6372      | 50      |
| H(20A) | 3930     | 7368     | 6614      | 54      |
| H(20B) | 3643     | 6917     | 8341      | 54      |
| H(20C) | 2303     | 6774     | 6609      | 54      |
| H(22A) | 4701     | 2945     | 9281      | 50      |
| H(22B) | 3333     | 3606     | 9541      | 50      |
| H(22C) | 5130     | 3466     | 10894     | 50      |
| H(1O)  | 5060(50) | 3600(20) | 5470(40)  | 100(12) |
| H(2O)  | 6700(30) | 6265(13) | 10000(30) | 50(6)   |



**Table S6. Torsion angles [°] for d12336.**

---

|                        |             |
|------------------------|-------------|
| C(3)-N(1)-C(1)-C(10)   | -78.11(19)  |
| C(3)-N(1)-C(1)-C(19)   | 44.29(18)   |
| C(3)-N(1)-C(1)-C(2)    | 161.11(13)  |
| C(11)-N(2)-C(2)-C(18)  | -13.0(2)    |
| C(11)-N(2)-C(2)-C(21)  | 108.15(16)  |
| C(11)-N(2)-C(2)-C(1)   | -136.51(14) |
| N(1)-C(1)-C(2)-N(2)    | -164.66(12) |
| C(10)-C(1)-C(2)-N(2)   | 75.59(16)   |
| C(19)-C(1)-C(2)-N(2)   | -47.48(15)  |
| N(1)-C(1)-C(2)-C(18)   | 68.61(15)   |
| C(10)-C(1)-C(2)-C(18)  | -51.14(17)  |
| C(19)-C(1)-C(2)-C(18)  | -174.22(12) |
| N(1)-C(1)-C(2)-C(21)   | -53.15(15)  |
| C(10)-C(1)-C(2)-C(21)  | -172.90(13) |
| C(19)-C(1)-C(2)-C(21)  | 64.03(15)   |
| C(1)-N(1)-C(3)-C(4)    | -177.38(13) |
| N(1)-C(3)-C(4)-C(9)    | -179.96(15) |
| N(1)-C(3)-C(4)-C(5)    | 1.1(2)      |
| C(9)-C(4)-C(5)-O(1)    | -177.71(14) |
| C(3)-C(4)-C(5)-O(1)    | 1.2(2)      |
| C(9)-C(4)-C(5)-C(6)    | 2.5(2)      |
| C(3)-C(4)-C(5)-C(6)    | -178.57(15) |
| O(1)-C(5)-C(6)-C(7)    | 179.45(16)  |
| C(4)-C(5)-C(6)-C(7)    | -0.8(2)     |
| C(5)-C(6)-C(7)-C(8)    | -1.7(3)     |
| C(6)-C(7)-C(8)-C(9)    | 2.2(3)      |
| C(7)-C(8)-C(9)-C(4)    | -0.4(3)     |
| C(5)-C(4)-C(9)-C(8)    | -1.9(2)     |
| C(3)-C(4)-C(9)-C(8)    | 179.12(16)  |
| C(2)-N(2)-C(11)-C(12)  | -173.55(13) |
| N(2)-C(11)-C(12)-C(13) | 5.8(2)      |
| N(2)-C(11)-C(12)-C(17) | -176.20(14) |
| C(17)-C(12)-C(13)-O(2) | -179.66(15) |
| C(11)-C(12)-C(13)-O(2) | -1.6(2)     |

|                         |             |
|-------------------------|-------------|
| C(17)-C(12)-C(13)-C(14) | 0.2(2)      |
| C(11)-C(12)-C(13)-C(14) | 178.23(15)  |
| O(2)-C(13)-C(14)-C(15)  | -179.21(15) |
| C(12)-C(13)-C(14)-C(15) | 1.0(2)      |
| C(13)-C(14)-C(15)-C(16) | -1.3(3)     |
| C(14)-C(15)-C(16)-C(17) | 0.5(3)      |
| C(15)-C(16)-C(17)-C(12) | 0.6(2)      |
| C(13)-C(12)-C(17)-C(16) | -1.0(2)     |
| C(11)-C(12)-C(17)-C(16) | -179.07(14) |
| C(20)-O(4)-C(19)-O(3)   | 0.4(3)      |
| C(20)-O(4)-C(19)-C(1)   | -179.43(14) |
| N(1)-C(1)-C(19)-O(3)    | 35.3(2)     |
| C(10)-C(1)-C(19)-O(3)   | 156.6(2)    |
| C(2)-C(1)-C(19)-O(3)    | -80.4(2)    |
| N(1)-C(1)-C(19)-O(4)    | -144.94(13) |
| C(10)-C(1)-C(19)-O(4)   | -23.6(2)    |
| C(2)-C(1)-C(19)-O(4)    | 99.40(15)   |
| C(22)-O(6)-C(21)-O(5)   | 3.8(3)      |
| C(22)-O(6)-C(21)-C(2)   | -179.33(13) |
| N(2)-C(2)-C(21)-O(5)    | 20.0(3)     |
| C(18)-C(2)-C(21)-O(5)   | 144.4(2)    |
| C(1)-C(2)-C(21)-O(5)    | -94.2(3)    |
| N(2)-C(2)-C(21)-O(6)    | -156.76(13) |
| C(18)-C(2)-C(21)-O(6)   | -32.37(19)  |
| C(1)-C(2)-C(21)-O(6)    | 89.11(16)   |

---

Symmetry transformations used to generate equivalent atoms:

**Table S7. Hydrogen bonds for d12336 [ $\text{\AA}$  and  $^\circ$ ].**

| D-H...A           | d(D-H)  | d(H...A) | d(D...A)   | $\angle$ (DHA) |
|-------------------|---------|----------|------------|----------------|
| O(1)-H(1O)...N(1) | 0.86(4) | 1.87(4)  | 2.6232(17) | 146(3)         |
| O(1)-H(1O)...O(6) | 0.86(4) | 2.48(3)  | 2.9914(17) | 119(3)         |
| O(2)-H(2O)...N(2) | 0.86(3) | 1.82(3)  | 2.6006(18) | 151(2)         |

Symmetry transformations used to generate equivalent atoms:
